# Supplementary material for: DisiMiR: Predicting Pathogenic miRNAs Using Network Influence and miRNA Conservation
Source: Noncoding RNA. 2022 Jun 23;8(4):45. doi: 10.3390/ncrna8040045 (PMC9326518; doi:10.3390/ncrna8040045)
Supplement: Supplementary file 1 [file ncrna-08-00045-s001.zip]

Archive with 5 entries (5 files):
- alzheimers_false_pos.csv
- breast_cancer_false_pos.csv
- gastric_false_pos.csv
- hepato_false_pos.csv
- ncrna-1746534-SI.pdf
