# Supplementary material for: DisiMiR: Predicting Pathogenic miRNAs Using Network Influence and miRNA Conservation
Source: Noncoding RNA. 2022 Jun 23;8(4):45. doi: 10.3390/ncrna8040045 (PMC9326518; doi:10.3390/ncrna8040045)
Supplement: Supplementary file 1 [file ncrna-08-00045-s001.zip › alzheimers_false_pos.csv]

	miRNAs	Manual Check	Pathogenicity	num_papers_returned	Causal_Papers	Non_Causal_Papers
0	mir-29b-2		FALSE	0	[]	[]
1	mir-3148		FALSE	0	[]	[]
2	mir-211	33527539	TRUE	4	[('33527539', "Role of miR-211 in a PC12 cell model of Alzheimer's disease via regulation of neurogenin 2."), ('33165916', "Role of Ten eleven translocation-2 (Tet2) in modulating neuronal morphology and cognition in a mouse model of Alzheimer's disease."), ('32706196', "The silent information regulator 1 pathway attenuates ROS-induced oxidative stress in Alzheimer's disease."), ('30314521', 'Der…	[]
3	mir-7-1		FALSE	0	[]	[]
4	mir-181b-2		FALSE	0	[]	[]
5	mir-365b		FALSE	1	[]	[('32920076', "Genome-wide profiling and predicted significance of post-mortem brain microRNA in Alzheimer's disease.")]
6	mir-6878		FALSE	18	[('35654038', 'gamma-secretase promotes Drosophila postsynaptic development through the cleavage of a Wnt receptor.'), ('35653878', 'Interrogating amyloid aggregation with aggregation-induced emission fluorescence probes.'), ('35652396', "NF-small ka, CyrillicB: a target for synchronizing the functioning nervous tissue progenitors of different types in Alzheimer's disease."), ('35649245', 'Safety…	[('35654537', 'The political presence of persons living with dementia in parliament. A qualitative study into the dementia representation work of German parliamentarians.'), ('35652476', "Global estimates on the number of persons across the Alzheimer's disease continuum."), ('35651352', 'The Clinical Course of Early and Late Mild Cognitive Impairment.'), ('35651350', "Application of High-Frequenc…
7	mir-372		FALSE	0	[]	[]
