# Supplementary material for: DisiMiR: Predicting Pathogenic miRNAs Using Network Influence and miRNA Conservation
Source: Noncoding RNA. 2022 Jun 23;8(4):45. doi: 10.3390/ncrna8040045 (PMC9326518; doi:10.3390/ncrna8040045)
Supplement: Supplementary file 1 [file ncrna-08-00045-s001.zip › breast_cancer_false_pos.csv]

	miRNAs	Manual Check	Pathogenicity	num_papers_returned	Causal_Papers	Non_Causal_Papers
0	mir-181a-2		FALSE	3	[]	[('34771077', 'Towards Unravelling the Role of ERalpha-Targeting miRNAs in the Exosome-Mediated Transferring of the Hormone Resistance.'), ('24917463', 'MicroRNA expression signatures for the prediction of BRCA1/2 mutation-associated hereditary breast cancer in paraffin-embedded formalin-fixed breast tumors.'), ('23774803', '[MicroRNA-profiling in breast- and salivary gland-derived adenoid cystic…
1	mir-515	34707022, 34630682	TRUE	14	[('34707022', 'Circular RNA hsa_circ_0103552 Promotes Proliferation, Migration, and Invasion of Breast Cancer Cells through Upregulating Cysteine-Rich Angiogenic Inducer 61 (CYR61) Expression via Sponging MicroRNA-515-5p.'), ('34630682', 'miR-515-5p inhibits the proliferation, migration and invasion of human breast cancer cells by targeting CBX4.'), ('32782003', 'Correction to: LINC00673 is activ…	[('34774083', 'Circular RNA circPIP5K1A contributes to cancer stemness of osteosarcoma by miR-515-5p/YAP axis.'), ('31606975', '6-Formylindolo[3,2-b]carbazole (FICZ) Enhances The Expression of Tumor Suppressor miRNAs, miR-22, miR-515-5p, and miR-124-3p in MCF-7 Cells.'), ('31122764', 'Targeting Non-coding RNA Sensitizes Cancer Cells to Drugs.'), ('30726072', 'A Designed Small Molecule Inhibitor o…
2	let-7d	33507713, 33526470	TRUE	12	[('33507713', 'Let-7d and miR-185 Impede Epithelial-Mesenchymal Transition by Downregulating Rab25 in Breast Cancer.'), ('31028134', 'A genetic variant rs13293512 in the promoter of let-7 is associated with an increased risk of breast cancer in Chinese women.'), ('29812973', 'Novel prognostic and predictive microRNA targets for triple-negative breast cancer.'), ('26358730', 'Inferred miRNA activi…	[('34298978', 'The Role of microRNA Let-7d in Female Malignancies and Diseases of the Female Reproductive Tract.'), ('33526470', 'Gain of HIF1 Activity and Loss of miRNA let-7d Promote Breast Cancer Metastasis to the Brain via the PDGF/PDGFR Axis.'), ('31063487', 'MicroRNAs as possible indicators of drug sensitivity in breast cancer cell lines.'), ('29975923', 'Let-7d Inhibits Growth and Metastas…
3	mir-196b	30416655	TRUE	10	[('30416655', 'Downregulation of MiR-196b-5p impedes cell proliferation and metastasis in breast cancer through regulating COL1A1.'), ('29950144', 'LncRNA H19-elevated LIN28B promotes lung cancer progression through sequestering miR-196b.'), ('28361910', 'Her-2 expression regulated by downregulation of miR-9 and which affects chemotherapeutic effect in breast cancer.'), ('22836757', 'MicroRNAs re…	[('34328099', 'Emerging roles of miRNAs in the development of pancreatic cancer.'), ('28789351', 'miR-196b, miR-378a and miR-486 are predictive biomarkers for the efficacy of vaccine treatment in colorectal cancer.'), ('28717596', 'Phenotypic and microRNA transcriptomic profiling of the MDA-MB-231 spheroid-enriched CSCs with comparison of MCF-7 microRNA profiling dataset.'), ('25451164', 'miRNA e…
4	mir-140	34180077	TRUE	19	[('34297787', 'Perception of breast cancer risk factors: Dysregulation of TGF-beta/miRNA axis in Pakistani females.'), ('34239305', 'Knockdown of LINC00504 Inhibits the Proliferation and Invasion of Breast Cancer via the Downregulation of miR-140-5p.'), ('34180077', 'microRNA-140-3p modulates invasiveness, motility, and extracellular matrix adhesion of breast cancer cells by targeting syndecan-4.…	[('35310909', 'Establishment and Comprehensive Analysis of Underlying microRNA-mRNA Interactive Networks in Ovarian Cancer.'), ('35201458', 'Interaction of microRNAs with sphingosine kinases, sphingosine-1 phosphate, and sphingosine-1 phosphate receptors in cancer.'), ('35120526', 'miR-140-3p is a potential differential biomarker in benign phyllodes tumors and fibroadenoma of the breast.'), ('350…
5	mir-144	27785072	TRUE	20	[('35551606', 'LINC00662 enhances cell progression and stemness in breast cancer by MiR-144-3p/SOX2 axis.'), ('34895046', 'miRNA-144 targeting DNAJC3-AS1 reverses the resistance of the breast cancer cell line Michigan Cancer Foundation-7 to doxorubicin.'), ('33177704', 'Molecular pathogenesis of breast cancer: impact of miR-99a-5p and miR-99a-3p regulation on oncogenic genes.'), ('31755218', 'RNA…	[('34774515', 'Discriminating Neoplastic from Nonneoplastic Tissues Using an miRNA-Based Deep Cancer Classifier.'), ('34513655', 'Circulating microRNAs in Early Breast Cancer Patients and Its Association With Lymph Node Metastases.'), ('33061623', 'Long Noncoding RNA EBLN3P Promotes the Progression of Liver Cancer via Alteration of microRNA-144-3p/DOCK4 Signal.'), ('32355466', 'A long non-coding …
6	mir-19a	33215433, 29864457	TRUE	20	[('34465793', 'Exosomal miR-19a and IBSP cooperate to induce osteolytic bone metastasis of estrogen receptor-positive breast cancer.'), ('33918859', 'Clinical Identification of Dysregulated Circulating microRNAs and Their Implication in Drug Response in Triple Negative Breast Cancer (TNBC) by Target Gene Network and Meta-Analysis.'), ('33215433', 'Upregulation of long noncoding RNA FERRE promoted…	[('35625825', 'Melatonin Modulation of Radiation-Induced Molecular Changes in MCF-7 Human Breast Cancer Cells.'), ('35337805', 'Expression level of miR-155, miR-15a and miR-19a in peripheral blood of ductal carcinoma breast cancer patients: Possible bioindicators for cellular inherent radiosensitivity.'), ('34979848', 'Differential expression of microRNA between triple negative breast cancer pati…
7	mir-30d	29923255, 30042152	TRUE	17	[('33839271', 'Construction of a lncRNA/pseudogene-hsa-miR-30d-5p-GJA1 regulatory network related to metastasis of pancreatic cancer.'), ('33824274', 'miR-30d suppresses proliferation and invasiveness of pancreatic cancer by targeting the SOX4/PI3K-AKT axis and predicts poor outcome.'), ('32770028', 'Mutant p53 induces Golgi tubulo-vesiculation driving a prometastatic secretome.'), ('32754259', '…	[('35155437', 'miR-30d-5p: A Non-Coding RNA With Potential Diagnostic, Prognostic and Therapeutic Applications.'), ('34200751', 'High miR-30 Expression Associates with Improved Breast Cancer Patient Survival and Treatment Outcome.'), ('33800944', 'MicroRNA as Epigenetic Modifiers in Endometrial Cancer: A Systematic Review.'), ('32825530', 'microRNA Expression Profile in Single Hormone Receptor-Po…
8	mir-210	35346372	TRUE	20	[('35346372', 'MIR210HG promotes breast cancer progression by IGF2BP1 mediated m6A modification.'), ('33918859', 'Clinical Identification of Dysregulated Circulating microRNAs and Their Implication in Drug Response in Triple Negative Breast Cancer (TNBC) by Target Gene Network and Meta-Analysis.'), ('33461524', 'Integrated analysis of mRNA and miRNA profiles revealed the role of miR-193 and miR-2…	[('35455015', 'Non-Exosomal and Exosome-Derived miRNAs as Promising Biomarkers in Canine Mammary Cancer.'), ('35340888', 'Overview of MicroRNA Expression in Predicting Response to Neoadjuvant Therapies in Human Epidermal Growth Receptor-2 Enriched Breast Cancer - A Systematic Review.'), ('34821131', 'MitomiRs: their roles in mitochondria and importance in cancer cell metabolism.'), ('34751517', '…
9	mir-92a	34082648	TRUE	20	[('34082648', 'MicroRNA miR-92a-3p regulates breast cancer cell proliferation and metastasis via regulating B-cell translocation gene 2 (BTG2).'), ('32039825', 'Long non-coding RNA MT1JP exerts anti-cancer effects in breast cancer cells by regulating miR-92-3p.'), ('29849934', 'MiR-92 suppresses proliferation and induces apoptosis by targeting EP4/Notch1 axis in gastric cancer.'), ('29162724', 'P…	[('35628433', 'miR-22-3p and miR-30e-5p Are Associated with Prognosis in Cervical Squamous Cell Carcinoma.'), ('35053623', 'Comprehensive Approach to Distinguish Patients with Solid Tumors from Healthy Controls by Combining Androgen Receptor Mutation p.H875Y with Cell-Free DNA Methylation and Circulating miRNAs.'), ('33620640', 'Circulating microRNA-92a-3p in colorectal cancer: a review.'), ('330…
10	mir-181b-2		FALSE	0	[]	[]
11	mir-301b	33063403, 34369713	TRUE	13	[('34281560', 'LINC01089 suppresses lung adenocarcinoma cell proliferation and migration via miR-301b-3p/STARD13 axis.'), ('33063403', 'miR-301b and NR3C2 co-regulate cells malignant properties and have the potential to be independent prognostic factors in breast cancer.'), ('30269739', 'MicroRNA-301b promotes cell proliferation and apoptosis resistance in triple-negative breast cancer by targeti…	[('34900984', 'ADAMTS9-AS1 Constrains Breast Cancer Cell Invasion and Proliferation via Sequestering miR-301b-3p.'), ('34439180', 'Circulating miRNAs as Novel Non-Invasive Biomarkers to Aid the Early Diagnosis of Suspicious Breast Lesions for Which Biopsy Is Recommended.'), ('34369713', 'MiR-301b-3p Promotes the Occurrence and Development of Breast Cancer Cells via Targeting HOXA5.'), ('33968126'…
12	mir-326	34620745, 35338412	TRUE	19	[('34981823', '[Retracted] lncRNA SNHG3 promotes breast cancer progression by acting as a miR326 sponge.'), ('34976014', 'Downregulation of hsa_circRNA_0001400 Helps to Promote Cell Apoptosis Through Disruption of the circRNA_0001400-miR-326 Sponge in Cervical Cancer Cells.'), ('34689156', 'Immune and nonimmune mechanisms mediate the mental stress-induced tumor growth in a xenograft model of brea…	[('35338412', 'Targeting HIF1-alpha/miR-326/ITGA5 axis potentiates chemotherapy response in triple-negative breast cancer.'), ('34513655', 'Circulating microRNAs in Early Breast Cancer Patients and Its Association With Lymph Node Metastases.'), ('34439268', 'MicroRNAs as Potential Predictors of Response to CDK4/6 Inhibitor Treatment.'), ('34388529', 'A review on the role of PCAT6 lncRNA in tumori…
13	mir-33a	32206036	TRUE	9	[('32652519', 'The circular RNA circEIF3M promotes breast cancer progression by promoting cyclin D1 expression.'), ('32206036', 'MiR-33a functions as a tumor suppressor in triple-negative breast cancer by targeting EZH2.'), ('31788073', 'MicroRNA-33a-5p overexpression sensitizes triple-negative breast cancer to doxorubicin by inhibiting eIF5A2 and epithelial-mesenchymal transition.'), ('30594253'…	[('34950209', 'Metabotropic Glutamate Receptor 8 Is Regulated by miR-33a-5p and Functions as an Oncogene in Breast Cancer.'), ('34771486', 'In Vitro Investigations of miR-33a Expression in Estrogen Receptor-Targeting Therapies in Breast Cancer Cells.'), ('27055396', 'MiR-33a Decreases High-Density Lipoprotein-Induced Radiation Sensitivity in Breast Cancer.')]
14	mir-30b	35116747	TRUE	20	[('35256590', 'ATG7-enhanced impaired autophagy exacerbates acute pancreatitis by promoting regulated necrosis via the miR-30b-5p/CAMKII pathway.'), ('32211051', 'Dietary alterations modulate the microRNA 29/30 and IGF-1/AKT signaling axis in breast Cancer liver metastasis.'), ('31093946', 'Involvement of miR-30b in kynurenine-mediated lysyl oxidase expression.'), ('35116747', 'miR-30b suppresses…	[('35200555', 'Circulating Exosomal microRNAs as Predictive Biomarkers of Neoadjuvant Chemotherapy Response in Breast Cancer.'), ('34445424', 'Analysis of the Applicability of microRNAs in Peripheral Blood Leukocytes as Biomarkers of Sensitivity and Exposure to Fractionated Radiotherapy towards Breast Cancer.'), ('34200463', 'Identification of a Two-MicroRNA Signature in Plasma as a Novel Biomark…
15	mir-449b	30738779	TRUE	7	[('32471413', 'MiR-449b-5p targets lncRNA PSMG3-AS1 to suppress cancer cell proliferation in lung adenocarcinoma.'), ('32374522', 'LncRNA HOTAIR enhances breast cancer radioresistance through facilitating HSPA1A expression via sequestering miR-449b-5p.'), ('31184216', 'Analysis of miRNA-mRNA network reveals miR-140-5p as a suppressor of breast cancer glycolysis via targeting GLUT1.'), ('30738779'…	[('28651018', 'Meta-analysis of miRNA expression profiles for prostate cancer recurrence following radical prostatectomy.'), ('27748845', 'MicroRNA profiling in human breast cancer cell lines exposed to the anti-neoplastic drug cediranib.'), ('27206146', 'Clinical and molecular markers of long-term survival after oligometastasis-directed stereotactic body radiotherapy (SBRT).')]
16	mir-32	33603481	TRUE	12	[('33603481', 'GATA1-Activated HNF1A-AS1 Facilitates the Progression of Triple-Negative Breast Cancer via Sponging miR-32-5p to Upregulate RNF38.'), ('33245732', 'MicroRNA-based regulation of Aurora A kinase in breast cancer.'), ('32307083', 'LncRNA WEE2-AS1 promotes proliferation and inhibits apoptosis in triple negative breast cancer cells via regulating miR-32-5p/TOB1 axis.'), ('31469874', 'Mi…	[('33638154', 'CUL4B renders breast cancer cells tamoxifen-resistant via miR-32-5p/ER-alpha36 axis.'), ('29115935', 'MicroRNA expression patterns in canine mammary cancer show significant differences between metastatic and non-metastatic tumours.')]
17	mir-125b	35057866, 35320453	TRUE	20	[('35057866', 'Tanshinone IIA attenuates the stemness of breast cancer cells via targeting the miR-125b/STARD13 axis.'), ('33541259', 'Increased expression of MUSASHI1 in epithelial breast cancer cells is due to down regulation of miR-125b.'), ('33159957', 'Docosahexaenoic acid reverses the promoting effects of breast tumor cell-derived exosomes on endothelial cell migration and angiogenesis.'), …	[('35616663', 'In Silico and Experimental Analysis of miR-125b-5 and miR-485-5p Expression in Serum of Patients with Breast Cancer.'), ('35430766', 'Robust delivery of RIG-I agonists using extracellular vesicles for anti-cancer immunotherapy.'), ('35320453', 'MiR-125b-5p/TPD52 Axis Affects Proliferation, Migration and Invasion of Breast Cancer Cells.'), ('35201458', 'Interaction of microRNAs with…
18	mir-15b	32016977	TRUE	20	[('35146902', 'CERS6-AS1 contributes to the malignant phenotypes of colorectal cancer cells by interacting with miR-15b-5p to regulate SPTBN2.'), ('33519190', 'Paeoniflorin Sensitizes Breast Cancer Cells to Tamoxifen by Downregulating microRNA-15b via the FOXO1/CCND1/beta-Catenin Axis.'), ('32016977', 'MiR-15b facilitates breast cancer progression via repressing tumor suppressor PAQR3.'), ('30594…	[('32175269', 'miR-15b-5p Promotes Growth and Metastasis in Breast Cancer by Targeting HPSE2.'), ('31930680', 'miRNAs as radio-response biomarkers for breast cancer stem cells.'), ('28824720', 'A Combination of DNA-peptide Probes and Liquid Chromatography-Tandem Mass Spectrometry (LC-MS/MS): A Quasi-Targeted Proteomics Approach for Multiplexed MicroRNA Quantification.'), ('28717596', 'Phenotypic …
19	mir-181a	34951340, 33730679	TRUE	20	[('35092121', 'Exosomes from M1-polarized macrophages promote apoptosis in lung adenocarcinoma via the miR-181a-5p/ETS1/STK16 axis.'), ('35029026', 'Autophagy inhibits cancer stemness in triple-negative breast cancer via miR-181a-mediated regulation of ATG5 and/or ATG2B.'), ('34951340', 'MiR-181a-5p facilitates proliferation, invasion, and glycolysis of breast cancer through NDRG2-mediated activa…	[('35371342', 'A Novel Necroptosis-Related miRNA Signature for Predicting the Prognosis of Breast Cancer Metastasis.'), ('34771077', 'Towards Unravelling the Role of ERalpha-Targeting miRNAs in the Exosome-Mediated Transferring of the Hormone Resistance.'), ('33923732', 'Expression of Estrogen Receptor- and Progesterone Receptor-Regulating MicroRNAs in Breast Cancer.'), ('33535487', 'Regulatory I…
20	mir-29c	29796115	TRUE	20	[('35078502', 'LncRNA IPW inhibits growth of ductal carcinoma in situ by downregulating ID2 through miR-29c.'), ('34035375', 'MicroRNA in combination with HER2-targeting drugs reduces breast cancer cell viability in vitro.'), ('33126129', 'Identification of mRNA and non-coding RNA hubs using network analysis in organ tropism regulated triple negative breast cancer metastasis.'), ('32211051', 'Die…	[('35053623', 'Comprehensive Approach to Distinguish Patients with Solid Tumors from Healthy Controls by Combining Androgen Receptor Mutation p.H875Y with Cell-Free DNA Methylation and Circulating miRNAs.'), ('34269309', 'Detection significance of miR-3662, miR-146a, and miR-1290 in serum exosomes of breast cancer patients.'), ('34201896', 'Expression and Function of C1orf132 Long-Noncoding RNA i…
21	let-7b	32248842, 31938021	TRUE	20	[('33164645', 'Matrine Inhibitory Effect on Self-renewal and Re-sensitization of 5-FU Resistant NSCLC Stem Cells were through Let-7b dependent Downregulation of CCND1.'), ('32248842', 'Long noncoding RNA HOST2, working as a competitive endogenous RNA, promotes STAT3-mediated cell proliferation and migration via decoying of let-7b in triple-negative breast cancer.'), ('31938021', 'Over-expression …	[('34191307', 'Retraction.'), ('32894240', 'MicroRNA profiling in serum: Potential signatures for breast cancer diagnosis.'), ('32585626', 'H19, a Long Non-coding RNA, Mediates Transcription Factors and Target Genes through Interference of MicroRNAs in Pan-Cancer.'), ('32204397', 'Integrative Analyses of Multilevel Omics Reveal Preneoplastic Breast to Possess a Molecular Landscape That is Globall…
22	mir-573		FALSE	1	[]	[('25333258', 'MiR-578 and miR-573 as potential players in BRCA-related breast cancer angiogenesis.')]
23	let-7e	30670152, 21969366	TRUE	8	[('29568399', 'CTBP1 and metabolic syndrome induce an mRNA and miRNA expression profile critical for breast cancer progression and metastasis.'), ('21969366', 'Jumonji/ARID1 B (JARID1B) protein promotes breast tumor cell cycle progression through epigenetic repression of microRNA let-7e.')]	[('30670152', 'Regulation of IL-6 signaling by miR-125a and let-7e in endothelial cells controls vasculogenic mimicry formation of breast cancer cells.'), ('30388053', 'Meta-microRNA Biomarker Signatures to Classify Breast Cancer Subtypes.'), ('25451164', 'miRNA expression patterns in chemoresistant breast cancer tissues.'), ('25240490', 'Breast- and salivary gland-derived adenoid cystic carcinom…
24	mir-215	34976151, 31538724	TRUE	17	[('34976151', 'Long non-coding RNA GAS6-AS1 enhances breast cancer cell aggressiveness by functioning as a competing endogenous RNA of microRNA-215-5p to enhance SOX9 expression.'), ('33635591', 'Integrated study of miR-215 promoting breast cancer cell apoptosis by targeting RAD54B.'), ('31538724', 'miRNA-215-5p suppresses the aggressiveness of breast cancer cells by targeting Sox9.'), ('31178137…	[('35366327', 'Al-MPS Obstructs EMT in Breast Cancer by Inhibiting Lipid Metabolism via miR-215-5p/SREBP1.'), ('35129049', 'Comprehensive analysis of peripheral blood non-coding RNAs identifies a diagnostic panel for fungal infection after transplantation.'), ('34921525', 'What if the future of HER2-positive breast cancer patients was written in miRNAs? An exploratory analysis from NeoALTTO study…
25	mir-363		FALSE	11	[('34058065', 'Circulating exosomal miR-363-5p inhibits lymph node metastasis by downregulating PDGFB and serves as a potential noninvasive biomarker for breast cancer.'), ('33472456', 'Silencing long non-coding RNA HNF1A-AS1 inhibits growth and resistance to TAM of breast cancer cells via the microRNA-363/SERTAD3 axis.'), ('31794425', 'Dysregulation of pseudogene/lncRNA-hsa-miR-363-3p-SPOCK2 pat…	[('34424807', 'Long non-coding RNA FOXD3 antisense RNA 1 augments anti-estrogen resistance in breast cancer cells through the microRNA-363/ trefoil factor 1/ phosphatidylinositol 3-kinase/protein kinase B axis.'), ('31976020', 'Identification of miRNA-Based Signature as a Novel Potential Prognostic Biomarker in Patients with Breast Cancer.'), ('28651018', 'Meta-analysis of miRNA expression profil…
26	mir-487a	32094325, 27019625	TRUE	5	[('34671217', 'Erratum: MiR-487a Promotes TGF-beta1-induced EMT, the Migration and Invasion of Breast Cancer Cells by Directly Targeting MAGI2.'), ('32094325', 'Circular RNA circRNF20 promotes breast cancer tumorigenesis and Warburg effect through miR-487a/HIF-1alpha/HK2.'), ('27019625', 'MiR-487a Promotes TGF-beta1-induced EMT, the Migration and Invasion of Breast Cancer Cells by Directly Target…	[('34646766', 'miRNome Profiling Reveals Shared Features in Breast Cancer Subtypes and Highlights miRNAs That Potentially Regulate MYB and EZH2 Expression.')]
27	mir-23a		FALSE	20	[('34327529', 'lncRNA NEAT1 promotes the Taxol resistance of breast cancer via sponging the miR-23a-3p-FOXA1 axis.'), ('33292246', 'SNHG17 promotes the proliferation and migration of colorectal adenocarcinoma cells by modulating CXCL12-mediated angiogenesis.'), ('32820148', 'Hippo/MST blocks breast cancer by downregulating WBP2 oncogene expression via miRNA processor Dicer.'), ('32605588', 'Secre…	[('34328099', 'Emerging roles of miRNAs in the development of pancreatic cancer.'), ('34257614', 'Identification of miRNA Signature in Breast Cancer to Predict Neoadjuvant Chemotherapy Response.'), ('34204158', 'A Signature of Four Circulating microRNAs as Potential Biomarkers for Diagnosing Early-Stage Breast Cancer.'), ('33311984', 'miRNA Expression Analysis: Cell Lines HCC1500 and HCC1937 as M…
28	mir-190a	32741666	TRUE	8	[('32741666', 'circCDYL Acts as a Tumor Suppressor in Triple Negative Breast Cancer by Sponging miR-190a-3p and Upregulating TP53INP1.'), ('29192413', 'Dysregulation of microRNAs in triple-negative breast cancer.'), ('26314494', 'The inhibitory effects of AR/miR-190a/YB-1 negative feedback loop on prostate cancer and underlying mechanism.'), ('24009311', 'A novel estrogen receptor-microRNA 190a-P…	[('35051067', "Effects of Endocrine Disruptors o,p'-Dichlorodiphenyltrichloroethane, p,p'-Dichlorodiphenyltrichloroethane, and Endosulfan on the Expression of Estradiol-, Progesterone-, and Testosterone-Responsive MicroRNAs and Their Target Genes in MCF-7 Cells."), ('34072264', 'LncRNA PART1 Promotes Proliferation and Migration, Is Associated with Cancer Stem Cells, and Alters the miRNA Landscape…
29	mir-499a		FALSE	3	[('33278391', 'Inhibition of breast cancer stem-like cells by a triterpenoid, ursolic acid, via activation of Wnt antagonist, sFRP4 and suppression of miRNA-499a-5p.')]	[('32403263', 'Circulating MicroRNAs as Potential Predictors of Anthracycline-Induced Troponin Elevation in Breast Cancer Patients: Diverging Effects of Doxorubicin and Epirubicin.'), ('23750236', 'Different effects of three polymorphisms in MicroRNAs on cancer risk in Asian population: evidence from published literatures.')]
