# Supplementary material for: DisiMiR: Predicting Pathogenic miRNAs Using Network Influence and miRNA Conservation
Source: Noncoding RNA. 2022 Jun 23;8(4):45. doi: 10.3390/ncrna8040045 (PMC9326518; doi:10.3390/ncrna8040045)
Supplement: Supplementary file 1 [file ncrna-08-00045-s001.zip › gastric_false_pos.csv]

	miRNAs	Manual Check	Pathogenicity	num_papers_returned	Causal_Papers	Non_Causal_Papers
0	mir-15b	35449111	TRUE	15	[('35449111', 'microRNA-15b-5p encapsulated by M2 macrophage-derived extracellular vesicles promotes gastric cancer metastasis by targeting BRMS1 and suppressing DAPK1 transcription.'), ('34124983', 'Protective role of astragaloside IV in gastric cancer through regulation of microRNA-195-5p-mediated PD-L1.'), ('33363587', 'miR-15b, a diagnostic biomarker and therapeutic target, inhibits oesophage…	[('34457199', 'Diagnostic value of four serum exosome microRNAs panel for the detection of colorectal cancer.'), ('34336682', 'Identification of Key Circulating Exosomal microRNAs in Gastric Cancer.'), ('32661467', 'Identifying specific miRNAs and associated mRNAs in CD44 and CD90 cancer stem cell subtypes in gastric cancer cell line SNU-5.'), ('31103022', 'Decreased miR-155-5p, miR-15a, and miR-…
1	mir-582	34898351	TRUE	7	[('34898351', 'Circular RNA circ_0000423 promotes gastric cancer cell proliferation, migration and invasion via the microR-582-3p/Disheveled-Axin domain containing 1 axis.'), ('32917936', 'LINC00641/miR-582-5p mediate oxaliplatin resistance by activating autophagy in gastric adenocarcinoma.'), ('32600329', 'Exosomal circSHKBP1 promotes gastric cancer progression via regulating the miR-582-3p/HUR/…	[('32636681', 'microRNA-582 Potentiates Liver and Lung Metastasis of Gastric Carcinoma Cells Through the FOXO3-Mediated PI3K/Akt/Snail Pathway.'), ('30373600', 'microRNAs expression profile related with response to preoperative radiochemotherapy in patients with locally advanced gastric cancer.')]
2	mir-199b	34532291	TRUE	2	[]	[('34840985', 'Construction of miRNA-mRNA-TF Regulatory Network for Diagnosis of Gastric Cancer.'), ('34532291', 'MiR-199b-5p Promotes Gastric Cancer Progression by Regulating HHIP Expression.')]
3	mir-96	33674746	TRUE	15	[('35034519', 'LncRNA HOXC-AS3 increases non-small cell lung cancer cell migration and invasion by sponging premature miR-96.'), ('33674746', 'MiR-19a/miR-96-mediated low expression of KIF26A suppresses metastasis by regulating FAK pathway in gastric cancer.'), ('32360623', 'The comprehensive upstream transcription and downstream targeting regulation network of miRNAs reveal potential diagnostic …	[('30258124', 'MicroRNA Expression Profiles in Gastric Carcinogenesis.'), ('23791657', 'Meta-analysis of microRNA-183 family expression in human cancer studies comparing cancer tissues with noncancerous tissues.')]
4	mir-302a	31037899	TRUE	5	[('31037899', '[Mechanism of hsa-miR-302a-3p-targeted VEGFA in the Inhibition of Proliferation of Gastric Cancer Cell].'), ('24861464', 'Inhibitors of enhancer of zeste homolog 2 (EZH2) activate tumor-suppressor microRNAs in human cancer cells.')]	[('32867271', 'ADAR1 Suppresses Interferon Signaling in Gastric Cancer Cells by MicroRNA-302a-Mediated IRF9/STAT1 Regulation.'), ('30854091', 'Comprehensive Analysis of Aberrantly Expressed ceRNA network in gastric cancer with and without H.pylori infection.'), ('28795345', 'Prognostic Implications of miR-302a/b/c/d in Human Gastric Cancer.')]
5	mir-376c	34284078, 28486502	TRUE	6	[('34284078', 'Inhibited HDAC3 promotes microRNA-376c-3p to suppress malignant phenotypes of gastric cancer cells by reducing WNT2b.'), ('32190005', 'CircPIP5K1A facilitates gastric cancer progression via miR-376c-3p/ZNF146 axis.'), ('28486502', 'miR-376c promotes carcinogenesis and serves as a plasma marker for gastric carcinoma.')]	[('31522605', 'Influence of miR-376c-3p/SYF2 Axis on the Progression of Gastric Cancer.'), ('27965982', 'hsa-miR-376c-3p Regulates Gastric Tumor Growth Both In Vitro and In Vivo.'), ('22432036', 'Identification of serum microRNAs as novel non-invasive biomarkers for early detection of gastric cancer.')]
6	mir-873	34790374	TRUE	9	[('34790374', 'MiR-873-5p targets THUMPD1 to inhibit gastric cancer cell behavior and chemoresistance.'), ('34370061', 'CircRNA_0043691 sponges miR-873-3p to promote metastasis of gastric cancer.'), ('32054332', 'Long non-coding RNA DDX11-AS1 facilitates gastric cancer progression by regulating miR-873-5p/SPC18 axis.'), ('31726370', 'LncRNA TDRG1 promotes the aggressiveness of gastric carcinoma t…	[('34659329', 'CircC6orf132 Facilitates Proliferation, Migration, Invasion, and Glycolysis of Gastric Cancer Cells Under Hypoxia by Acting on the miR-873-5p/PRKAA1 Axis.'), ('34012268', 'Inhibition of circRNA circVPS33B Reduces Warburg Effect and Tumor Growth Through Regulating the miR-873-5p/HNRNPK Axis in Infiltrative Gastric Cancer.'), ('31275362', 'miRNome Reveals New Insights Into the Molecu…
7	mir-26b	27078844	TRUE	7	[('31509966', 'E-cadherin Downregulation and microRNAs in Sporadic Intestinal-Type Gastric Cancer.'), ('30899303', 'Mir-26b inhibits growth and resistance to paclitaxel chemotherapy by silencing the CDC6 gene in gastric cancer.'), ('27078844', 'MicroRNA-26b inhibits tumor metastasis by targeting the KPNA2/c-jun pathway in human gastric cancer.'), ('24573489', 'miR-7 inhibits the invasion and meta…	[('28521416', 'A proposed method for the relative quantification of levels of circulating microRNAs in the plasma of gastric cancer patients.'), ('25730011', 'Differential microRNA expression in signet-ring cell carcinoma compared with tubular adenocarcinoma of human gastric cancer.'), ('22407237', 'Clinicopathological and prognostic significance of microRNA-107 and its relationship to DICER1 mRN…
8	mir-181c		FALSE	9	[('31040894', 'Up-regulation of tumor necrosis factor-alpha pathway survival genes and of the receptor TNFR2 in gastric cancer.'), ('27698859', 'Iodine-125 irradiation inhibits invasion of gastric cancer cells by reactivating microRNA-181c expression.'), ('23803080', 'Upregulation of microRNA 181c expression in gastric cancer tissues and plasma.'), ('23667495', 'Multiple-to-multiple relationships…	[('29243018', 'Decreased MicroRNA miR-181c Expression Associated with Gastric Cancer.'), ('20080834', 'Involvement of epigenetically silenced microRNA-181c in gastric carcinogenesis.')]
9	mir-378a	35274046	TRUE	4	[('35274046', 'lncRNA ACTA2-AS1 inhibits malignant phenotypes of gastric cancer cells.')]	[('34247571', 'Characterization of TGFbeta-associated molecular features and drug responses in gastrointestinal adenocarcinoma.'), ('33841514', 'RNA-Associated Co-expression Network Identifies Novel Biomarkers for Digestive System Cancer.'), ('33601149', 'A review on the role of oncogenic lncRNA OIP5-AS1 in human malignancies.')]
10	mir-374b	25516656	TRUE	4	[('25516656', 'MiR-374b-5p suppresses RECK expression and promotes gastric cancer cell invasion and metastasis.')]	[('32617008', 'RPL38 Regulates the Proliferation and Apoptosis of Gastric Cancer via miR-374b-5p/VEGF Signal Pathway.'), ('29902839', 'MiR-374b Promotes Proliferation and Inhibits Apoptosis of Human GIST Cells by Inhibiting PTEN through Activation of the PI3K/Akt Pathway.'), ('24054006', '[Relationship between the expression level of miR-29c and biological behavior of gastric cancer].')]
11	let-7a-2		FALSE	1	[('24760009', 'A new polymorphism biomarker rs629367 associated with increased risk and poor survival of gastric cancer in chinese by up-regulated miRNA-let-7a expression.')]	[]
12	mir-24-1		FALSE	2	[]	[('35379158', 'The Identification and Analysis of MicroRNAs Combined Biomarkers for Hepatocellular Carcinoma Diagnosis.'), ('22969895', 'miRNA expression profile in primary gastric cancers and paired lymph node metastases indicates that miR-10a plays a role in metastasis from primary gastric cancer to lymph nodes.')]
13	mir-376c	34284078, 28486502	TRUE	6	[('34284078', 'Inhibited HDAC3 promotes microRNA-376c-3p to suppress malignant phenotypes of gastric cancer cells by reducing WNT2b.'), ('32190005', 'CircPIP5K1A facilitates gastric cancer progression via miR-376c-3p/ZNF146 axis.'), ('28486502', 'miR-376c promotes carcinogenesis and serves as a plasma marker for gastric carcinoma.')]	[('31522605', 'Influence of miR-376c-3p/SYF2 Axis on the Progression of Gastric Cancer.'), ('27965982', 'hsa-miR-376c-3p Regulates Gastric Tumor Growth Both In Vitro and In Vivo.'), ('22432036', 'Identification of serum microRNAs as novel non-invasive biomarkers for early detection of gastric cancer.')]
14	mir-29b-2		FALSE	2	[]	[('33841514', 'RNA-Associated Co-expression Network Identifies Novel Biomarkers for Digestive System Cancer.'), ('24054006', '[Relationship between the expression level of miR-29c and biological behavior of gastric cancer].')]
15	mir-148b	29587866	TRUE	12	[('34823423', 'Ubiquitin-associated protein 2 like (UBAP2L) enhances growth and metastasis of gastric cancer cells.'), ('29587866', 'miR-148b-3p inhibits gastric cancer metastasis by inhibiting the Dock6/Rac1/Cdc42 axis.'), ('28440026', 'miR-148b inhibits glycolysis in gastric cancer through targeting SLC2A1.'), ('26530325', 'MicroRNA-148b targets Rho-associated protein kinase 1 to inhibit cell p…	[('34852637', 'miRNA-148b and its role in various cancers.'), ('33717068', 'Targeting miR-148b-5p Inhibits Immunity Microenvironment and Gastric Cancer Progression.'), ('33527791', 'HOTAIR Induces Methylation of PCDH10, a Tumor Suppressor Gene, by Regulating DNMT1 and Sponging with miR-148b in Gastric Adenocarcinoma.'), ('28043146', 'Microarray analysis of long non-coding RNAs related to microRNA…
16	mir-195	35037833	TRUE	19	[('35287551', 'MicorRNA-195 links long non-coding RNA SEMA3B antisense RNA 1 (head to head) and cyclin D1 to regulate the proliferation of glioblastoma cells.'), ('35037833', 'Long intergenic non-protein coding RNA 662 accelerates the progression of gastric cancer through up-regulating centrosomal protein 55 by sponging microRNA-195-5p.'), ('34427967', 'LINC00511 promotes gastric cancer progressi…	[('34422636', 'Evaluation of the Diagnostic Potential of a Plasma Exosomal miRNAs Panel for Gastric Cancer.'), ('34268410', 'Gastric cancer-associated microRNA expression signatures: integrated bioinformatics analysis, validation, and clinical significance.'), ('33811245', 'Association of sonic hedgehog signaling pathway genes IHH, BOC, RAB23a and MIR195-5p, MIR509-3-5p, MIR6738-3p with gastric c…
17	mir-192	33127874	TRUE	20	[('33127874', 'Histone methyltransferase SET8 is regulated by miR-192/215 and induces oncogene-induced senescence via p53-dependent DNA damage in human gastric carcinoma cells.'), ('30854110', 'MiR-192-5p reverses cisplatin resistance by targeting ERCC3 and ERCC4 in SGC7901/DDP cells.'), ('30006518', 'Inhibition of the miR-192/215-Rab11-FIP2 axis suppresses human gastric cancer progression.'), ('…	[('34220948', 'Oncological Effects and Prognostic Value of AMAP1 in Gastric Cancer.'), ('32307002', 'Evaluating the expression level of miR-9-5p and miR-192-5p in gastrointestinal cancer: introducing novel screening biomarkers for patients.'), ('31164867', 'Bariatric Surgery Modulates Urinary Levels of MicroRNAs Involved in the Regulation of Renal Function.'), ('27081844', 'Tissue microRNAs as pr…
