# Supplementary material for: DisiMiR: Predicting Pathogenic miRNAs Using Network Influence and miRNA Conservation
Source: Noncoding RNA. 2022 Jun 23;8(4):45. doi: 10.3390/ncrna8040045 (PMC9326518; doi:10.3390/ncrna8040045)
Supplement: Supplementary file 1 [file ncrna-08-00045-s001.zip › hepato_false_pos.csv]

	miRNAs	Manual Check	Pathogenicity	num_papers_returned	Causal_Papers	Non_Causal_Papers
0	mir-381	35184652, 26677080	TRUE	7	[('35184652', 'Enhancer of zeste homolog 2 promotes hepatocellular cancer progression and chemoresistance by enhancing protein kinase B activation through microRNA-381-mediated SET domain bifurcated 1.'), ('30945294', 'Wnt pathway targeting reduces triple-negative breast cancer aggressiveness through miRNA regulation in vitro and in vivo.'), ('30114287', 'miRNA expression profiles of premalignant…	[('34931867', 'miR-381 Reverses Multidrug Resistance by Negative Regulation of the CTNNB1/ABCB1 Pathway in HepG2/Dox Cells, and the Diagnostic and Prognostic Values of CTNNB1/ABCB1 Are Identified in Patients with LIHC.')]
1	mir-208b		FALSE	0	[]	[]
2	mir-320e		FALSE	0	[]	[]
3	mir-3144		FALSE	0	[]	[]
4	mir-33a	32627938, 32621257	TRUE	15	[('32665773', 'Tumor mutation burden associated with miRNA-gene interaction outcome mediates the survival of patients with liver hepatocellular carcinoma.'), ('32627938', 'Circ-SPECC1 modulates TGFbeta2 and autophagy under oxidative stress by sponging miR-33a to promote hepatocellular carcinoma tumorigenesis.'), ('32621257', 'Long non-coding RNA CRNDE promotes malignant progression of hepatocellu…	[('33465419', 'Expression of miR-18a-5p, miR-144-3p, and miR-663b in colorectal cancer and their association with cholesterol homeostasis.'), ('33098283', 'Role of mir-33a, mir-203b, mir361-3p, and mir-424 in hepatocellular carcinoma'), ('30943047', 'microRNA-33a prevents epithelial-mesenchymal transition, invasion, and metastasis of gastric cancer cells through the Snail/Slug pathway.'), ('27881…
5	mir-93	34435526, 33831356	TRUE	20	[('34435526', 'miR-93-5p knockdown repressed hepatocellular carcinoma progression via increasing ERBB4 and TETs-dependent DNA demethylation.'), ('33831356', 'miR-93 regulates liver tumor initiating cells expansion and predicts chemotherapeutic response of patients.'), ('33760164', 'miR-93-5p promotes insulin resistance to regulate type 2 diabetes progression in HepG2 cells by targeting HGF.'), ('…	[('35377979', 'MiR-93-5P Represses the Gluconeogenesis of Hepatocellular Carcinoma while Boosting Its Glycolysis and Malignant Progression by Suppressing PCK1.'), ('35037761', 'Prognostic potential of circulating miR-93-5p in patients with colorectal cancer liver metastases.'), ('34175168', 'Urine miR-93-5p is a promising biomarker for early detection of HBV-related hepatocellular carcinoma.'), (…
6	mir-339	30774308	TRUE	7	[('30774308', 'MicroRNA-339 inhibits human hepatocellular carcinoma proliferation and invasion via targeting ZNF689.'), ('26640557', 'Bafilomycin A1 inhibits the growth and metastatic potential of the BEL-7402 liver cancer and HO-8910 ovarian cancer cell lines and induces alterations in their microRNA expression.'), ('25404690', 'microRNA-339-5p modulates Na+/I- symporter-mediated radioiodide upt…	[('30462625', 'miR-339-5p Increases Radiosensitivity of Lung Cancer Cells by Targeting Phosphatases of Regenerating Liver-1 (PRL-1).'), ('28275578', 'MicroRNAs for the Prediction of Early Response to Sorafenib Treatment in Human Hepatocellular Carcinoma.'), ('26186881', 'Effects of miR-339-5p on invasion and prognosis of hepatocellular carcinoma.')]
7	mir-190a	35199873	TRUE	2	[('35199873', 'CircRNA_0008194 functions as a ceRNA to promote invasion of hepatocellular carcinoma via inhibiting miR-190a/AHNAK signaling pathway.'), ('26608035', 'miR-190a inhibits epithelial-mesenchymal transition of hepatoma cells via targeting the long non-coding RNA treRNA.')]	[]
8	mir-519e		FALSE	0	[]	[]
9	mir-19b	32315652	TRUE	13	[('32315652', 'MiR-19b-3p facilitates the proliferation and epithelial-mesenchymal transition, and inhibits the apoptosis of intrahepatic cholangiocarcinoma by suppressing coiled-coil domain containing 6.'), ('31186404', 'MIR17HG-miR-18a/19a axis, regulated by interferon regulatory factor-1, promotes gastric cancer metastasis via Wnt/beta-catenin signalling.'), ('31949783', 'Up-regulation of micr…	[('35386284', 'Identification of lncRNA/circRNA-miRNA-mRNA ceRNA Network as Biomarkers for Hepatocellular Carcinoma.'), ('32884453', 'Good or not good: Role of miR-18a in cancer biology.'), ('29889802', 'MicroRNA-17, MicroRNA-19b, MicroRNA-146a, MicroRNA-302d Expressions in Hepatoblastoma and Clinical Importance.'), ('28904393', 'MicroRNA pharmacogenomics based integrated model of miR-17-92 clust…
10	mir-630	26993767	TRUE	3	[('26993767', 'MicroRNA-630 suppresses tumor metastasis through the TGF-beta- miR-630-Slug signaling pathway and correlates inversely with poor prognosis in hepatocellular carcinoma.')]	[('34392090', 'CircMTO1: A circular RNA with roles in the carcinogenesis.'), ('25731670', 'miR-630 overexpression in hepatocellular carcinoma tissues is positively correlated with alpha-fetoprotein.')]
11	mir-30c-1	22320217	TRUE	1	[('22320217', 'miR-30c-1* promotes natural killer cell cytotoxicity against human hepatoma cells by targeting the transcription factor HMBOX1.')]	[]
12	mir-146b	34251499	TRUE	16	[('34311393', 'Perturbation of miR-146b and relevant inflammatory elements in esophageal carcinoma patients supports an immune downregulatory mechanism.'), ('34251499', 'LncRNA H19 modulated by miR-146b-3p/miR-1539-mediated allelic regulation in transarterial chemoembolization of hepatocellular carcinoma.'), ('30145833', 'Cytokine-mediated modulation of the hepatic miRNome: miR-146b-5p is an IL-6…	[('35340237', 'Bioinformatics Methods Reveal the Biomarkers and the miRNA-mRNA Network in Hepatocellular Carcinoma.'), ('34381502', 'Long Noncoding RNA MIR100HG Knockdown Attenuates Hepatocellular Carcinoma Progression by Regulating MicroRNA-146b-5p/Chromobox 6.'), ('29907753', 'Validation of miRNA prognostic power in hepatocellular carcinoma using expression data of independent datasets.'), ('28…
13	mir-888	30915745	TRUE	3	[('30915745', 'MiR-888 promotes cell migration and invasion of hepatocellular carcinoma by targeting SMAD4.'), ('28337887', 'Up-regulation of miR-888-5p in hepatocellular carcinoma cell lines and its effect on malignant characteristics of cells.')]	[('35473892', 'Differences Between Sorafenib and Lenvatinib Treatment from Genetic and Clinical Perspectives for Patients with Hepatocellular Carcinoma.')]
14	mir-95	27698442	TRUE	7	[('32418767', 'MicroRNA-95-3p inhibits cell proliferation and metastasis in colorectal carcinoma by HDGF.'), ('27698442', 'Up-regulation of miR-95-3p in hepatocellular carcinoma promotes tumorigenesis by targeting p21 expression.')]	[('30064138', 'Identifying Differentially Expressed MicroRNAs Between Cirrhotic and Non-Cirrhotic Hepatocellular Carcinoma and Exploring Their Functions Using Bioinformatic Analysis.'), ('27275163', 'The Liver MicroRNA Expression Profiles Associated With Chronic Hepatitis C Virus (HCV) Genotype-4 Infection: A Preliminary Study.'), ('25217977', 'Induction of cancer-related microRNA expression prof…
15	mir-133b	27090017	TRUE	12	[('31675755', 'Ferritin Light Chain (FTL) competes with long noncoding RNA Linc00467 for miR-133b binding site to regulate chemoresistance and metastasis of colorectal cancer.'), ('27090017', 'MicroRNA-133b inhibits hepatocellular carcinoma cell progression by targeting Sirt1.'), ('27074866', 'Protein phosphatase 2A-B55delta enhances chemotherapy sensitivity of human hepatocellular carcinoma unde…	[('34355586', 'MiR-188-3p and miR-133b Suppress Cell Proliferation in Human Hepatocellular Carcinoma via Post-Transcriptional Suppression of NDRG1.'), ('30723051', 'Overexpression of TONSL might be an independent unfavorable prognostic indicator in hepatocellular carcinoma.'), ('30653948', 'Circulating miR-26a, miR-106b, miR-107 and miR-133b stratify hepatocellular carcinoma patients according to…
16	mir-513c	33277615	TRUE	2	[('33277615', 'Upregulated lncRNA DLX6-AS1 underpins hepatocellular carcinoma progression via the miR-513c/Cul4A/ANXA10 axis.'), ('29574975', 'LncRNA FLVCR1-AS1 acts as miR-513c sponge to modulate cancer cell proliferation, migration, and invasion in hepatocellular carcinoma.')]	[]
17	mir-3651		FALSE	1	[]	[('29899182', 'Microarray Expression Profiling of microRNAs Reveals Potential Biomarkers for Hepatocellular Carcinoma.')]
18	mir-181c	34097562	TRUE	4	[('34097562', 'ZSCAN16-AS1 expedites hepatocellular carcinoma progression via modulating the miR-181c-5p/SPAG9 axis to activate the JNK pathway.'), ('31114379', 'MicroRNA181c suppresses growth and metastasis of hepatocellular carcinoma by modulating NCAPG.'), ('27061051', 'beta-ionone modulates the expression of miRNAs and genes involved in the metastatic phenotype of microdissected persistent pr…	[('28218475', 'Profound changes in miRNA expression during cancer initiation by aflatoxin B1 and their abrogation by the chemopreventive triterpenoid CDDO-Im.')]
19	mir-513c	33277615	TRUE	2	[('33277615', 'Upregulated lncRNA DLX6-AS1 underpins hepatocellular carcinoma progression via the miR-513c/Cul4A/ANXA10 axis.'), ('29574975', 'LncRNA FLVCR1-AS1 acts as miR-513c sponge to modulate cancer cell proliferation, migration, and invasion in hepatocellular carcinoma.')]	[]
20	mir-939	32218824	TRUE	5	[('32218824', 'miR-939-3p promotes epithelial-mesenchymal transition and may be used as a prognostic marker in hepatocellular carcinoma.')]	[('29081216', 'Long Noncoding RNA HEIH Promotes Colorectal Cancer Tumorigenesis via Counteracting miR-939Mediated Transcriptional Repression of Bcl-xL.'), ('28651018', 'Meta-analysis of miRNA expression profiles for prostate cancer recurrence following radical prostatectomy.'), ('26509672', 'Circulating microRNAs, miR-939, miR-595, miR-519d and miR-494, Identify Cirrhotic Patients with HCC.'), ('…
21	mir-25	34384713	TRUE	20	[('35165511', 'MiR-25 enhances autophagy and promotes sorafenib resistance of hepatocellular carcinoma via targeting FBXW7.'), ('34384713', 'Exosomal microRNA-25 released from cancer cells targets SIK1 to promote hepatocellular carcinoma tumorigenesis.'), ('33549596', 'Microvesicles mediate sorafenib resistance in liver cancer cells through attenuating p53 and enhancing FOXM1 expression.'), ('333…	[('33886022', 'MicroRNA-25 Exerts an Oncogenic Function by Regulating the Ubiquitin Ligase Fbxw7 in Hepatocellular Carcinoma.'), ('32537885', 'Exosomal microRNA-4661-5p-based serum panel as a potential diagnostic biomarker for early-stage hepatocellular carcinoma.'), ('30536673', 'microRNAs: Key players in virus-associated hepatocellular carcinoma.'), ('29859516', 'Up-Regulation of miR-21, miR-25…
22	mir-604		FALSE	1	[]	[('25408584', 'Association of polymorphism in microRNA 604 with susceptibility to persistent hepatitis B virus infection and development of hepatocellular carcinoma.')]
23	mir-943		FALSE	2	[('25070813', 'Genome-wide analysis of genetic variations assisted by Ingenuity Pathway Analysis to comprehensively investigate potential genetic targets associated with the progression of hepatocellular carcinoma.')]	[('27554417', 'Diagnosis of HCC for patients with cirrhosis using miRNA profiles of the tumor-surrounding tissue - A statistical model based on stepwise penalized logistic regression.')]
24	mir-30c-2	30773676	TRUE	1	[('30773676', 'Upregulated LncRNA-CCAT1 promotes hepatocellular carcinoma progression by functioning as miR-30c-2-3p sponge.')]	[]
25	mir-128-2		FALSE	1	[]	[('25642945', 'Serum miR-128-2 serves as a prognostic marker for patients with hepatocellular carcinoma.')]
26	mir-2116		FALSE	1	[]	[('23205106', 'Identification of pathogenesis-related microRNAs in hepatocellular carcinoma by expression profiling.')]
27	mir-490	32831914	TRUE	20	[('33094503', 'miR-490: A potential biomarker and therapeutic target in cancer and other diseases.'), ('32831914', 'MicroRNA-490-3p suppresses the proliferation and invasion of hepatocellular carcinoma cells via targeting TMOD3.'), ('32190151', 'MicroRNA-490-3p suppresses hepatocellular carcinoma cell proliferation and migration by targeting the aurora kinase A gene (AURKA).'), ('31920461', 'LncR…	[('32673066', 'Circular RNA circ_0091579 Promotes Hepatocellular Carcinoma Proliferation, Migration, Invasion, and Glycolysis Through miR-490-5p/CASC3 Axis.'), ('31858324', 'RP11-81H3.2 Acts as an Oncogene via microRNA-490-3p Inhibition and Consequential Tankyrase 2 Up-Regulation in Hepatocellular Carcinoma.'), ('30007991', 'Investigation of miR-490-3p Expression in Hepatocellular Carcinoma Based…
28	let-7d		FALSE	4	[('32610114', 'Dampened VEPH1 activates mTORC1 signaling by weakening the TSC1/TSC2 association in hepatocellular carcinoma.')]	[('34989596', 'Circulating MicroRNAs, Polychlorinated Biphenyls, and Environmental Liver Disease in the Anniston Community Health Survey.'), ('32301252', 'Longitudinal analysis of serum microRNAs as predictors of cirrhosis regression during treatment of hepatitis B virus infection.'), ('32102538', 'Serum microRNA let-7a-1/let-7d/let-7f and miRNA 143/145 Gene Expression Profiles as Potential Bioma…
29	mir-1238		FALSE	1	[]	[('26812476', 'Clinico-Pathological Association of Delineated miRNAs in Uveal Melanoma with Monosomy 3/Disomy 3 Chromosomal Aberrations.')]
30	mir-489	33402977	TRUE	6	[('33402977', 'Effects of miR-489 targeting on SOX4 gene on proliferation and apoptosis of human hepatocellular carcinoma cells.'), ('29859298', 'Autotaxin exacerbates tumor progression by enhancing MEK1 and overriding the function of miR-489-3p.'), ('29071516', 'MiR-489 suppresses tumor growth and invasion by targeting HDAC7 in colorectal cancer.'), ('28430582', 'LncRNA CHRF-induced miR-489 loss…	[('28651018', 'Meta-analysis of miRNA expression profiles for prostate cancer recurrence following radical prostatectomy.'), ('28430373', 'A five-miRNA expression signature predicts survival in hepatocellular carcinoma.')]
31	mir-30c	26101708	TRUE	20	[('35296659', 'The aberrant upregulation of exon 10-inclusive SREK1 through SRSF10 acts as an oncogenic driver in human hepatocellular carcinoma.'), ('34695895', '[Effects of tumor protein translation control antisense RNA1 on radiosensitivity, proliferation, migration and invasion of hepatocellular carcinoma cells by targeting miR-30c-5p].'), ('34503377', 'Identification of microRNA hsa-miR-30c-…	[('35632731', 'Gga-miR-30c-5p Enhances Apoptosis in Fowl Adenovirus Serotype 4-Infected Leghorn Male Hepatocellular Cells and Facilitates Viral Replication through Myeloid Cell Leukemia-1.'), ('35278429', 'Novel efficacious microRNA-30c analogs reduce apolipoprotein B secretion in human hepatoma and primary hepatocyte cells.'), ('34149922', 'Hallmark microRNA signature in liquid biopsy identifies…
32	mir-181a-2		FALSE	1	[('26640557', 'Bafilomycin A1 inhibits the growth and metastatic potential of the BEL-7402 liver cancer and HO-8910 ovarian cancer cell lines and induces alterations in their microRNA expression.')]	[]
33	mir-196b	30988277	TRUE	10	[('31299165', 'RP5-1120P11.3 promotes hepatocellular carcinoma development via the miR-196b-5p-WIPF2 axis.'), ('30988277', 'MicroRNA-196a/-196b regulate the progression of hepatocellular carcinoma through modulating the JAK/STAT pathway via targeting SOCS2.')]	[('31632480', 'Clinical Significance of microRNA-196b-5p in Hepatocellular Carcinoma and its Potential Molecular Mechanism.'), ('29997205', 'Transduction with Lentiviral Vectors Altered the Expression Profile of Host MicroRNAs.'), ('29246322', 'Long Noncoding RNA HCAL Facilitates the Growth and Metastasis of Hepatocellular Carcinoma by Acting as a ceRNA of LAPTM4B.'), ('28415758', 'Differential m…
34	mir-708	28789462	TRUE	12	[('34583064', 'Elevated LINC01232 is associated with poor prognosis and HBV infection in hepatocellular carcinoma patients and contributes to tumor progression in vitro.'), ('33514855', 'ZEB1 serves an oncogenic role in the tumourigenesis of HCC by promoting cell proliferation, migration, and inhibiting apoptosis via Wnt/beta-catenin signaling pathway.'), ('31419576', 'Relevance function of micro…	[('31486298', 'Identification and external validation of a novel miRNA signature for lymph node metastasis prediction in submucosal-invasive gastric cancer patients.')]
35	mir-328	31773692	TRUE	12	[('34016787', 'LncRNA LOC146880 promotes esophageal squamous cell carcinoma progression via miR-328-5p/FSCN1/MAPK axis.'), ('32228643', 'Upregulation of microRNA-328-3p by hepatitis B virus contributes to THLE-2 cell injury by downregulating FOXO4.'), ('32142853', 'MiR-328-3p inhibits cell proliferation and metastasis in colorectal cancer by targeting Girdin and inhibiting the PI3K/Akt signaling …	[('32547226', 'Long Noncoding RNA DIO3OS Hinders Cell Malignant Behaviors of Hepatocellular Carcinoma Cells Through the microRNA-328/Hhip Axis.'), ('31148183', 'A Noncoding Regulatory RNAs Network Driven by Circ-CDYL Acts Specifically in the Early Stages Hepatocellular Carcinoma.'), ('28415718', 'Exosomal microRNAs isolated from plasma of mesenteric veins linked to liver metastases in resected pa…
36	mir-218-2	26024833	TRUE	1	[('26024833', 'Hotair mediates hepatocarcinogenesis through suppressing miRNA-218 expression and activating P14 and P16 signaling.')]	[]
37	mir-146b	28404923	TRUE	16	[('34311393', 'Perturbation of miR-146b and relevant inflammatory elements in esophageal carcinoma patients supports an immune downregulatory mechanism.'), ('34251499', 'LncRNA H19 modulated by miR-146b-3p/miR-1539-mediated allelic regulation in transarterial chemoembolization of hepatocellular carcinoma.'), ('30145833', 'Cytokine-mediated modulation of the hepatic miRNome: miR-146b-5p is an IL-6…	[('35340237', 'Bioinformatics Methods Reveal the Biomarkers and the miRNA-mRNA Network in Hepatocellular Carcinoma.'), ('34381502', 'Long Noncoding RNA MIR100HG Knockdown Attenuates Hepatocellular Carcinoma Progression by Regulating MicroRNA-146b-5p/Chromobox 6.'), ('29907753', 'Validation of miRNA prognostic power in hepatocellular carcinoma using expression data of independent datasets.'), ('28…
38	mir-22	34094675	TRUE	20	[('34983308', 'ETS Proto-Oncogene 1-activated muskelin 1 antisense RNA drives the malignant progression of hepatocellular carcinoma by targeting miR-22-3p to upregulate ETS Proto-Oncogene 1.'), ('34094675', 'MiR-22 regulated T cell differentiation and hepatocellular carcinoma growth by directly targeting Jarid2.'), ('34019487', 'Chronic alcohol exposure promotes HCC stemness and metastasis throug…	[('35480884', 'The Predictive Competing Endogenous RNA Regulatory Networks and Potential Prognostic and Immunological Roles of Cyclin A2 in Pan-Cancer Analysis.'), ('35306563', 'LncRNA NCK1-AS1 Aggravates Hepatocellular Carcinoma by the miR-22-3p/YARS Axis to Activate PI3K/AKT Signaling.'), ('35282644', 'High Expression of RRM1 Mediated by ncRNAs Correlates with Poor Prognosis and Tumor Immune In…
39	mir-323b		FALSE	0	[]	[]
40	mir-129-1	22865282	TRUE	1	[('22865282', 'A functional screening identifies five microRNAs controlling glypican-3: role of miR-1271 down-regulation in hepatocellular carcinoma.')]	[]
41	mir-1249	31429522	TRUE	4	[('31429522', 'miR-1249-3p accelerates the malignancy phenotype of hepatocellular carcinoma by directly targeting HNRNPK.'), ('29672926', 'Insights into the etiology-associated gene regulatory networks in hepatocellular carcinoma from The Cancer Genome Atlas.'), ('28365245', 'Induced MiR-1249 expression by aberrant activation of Hedegehog signaling pathway in hepatocellular carcinoma.')]	[('23205106', 'Identification of pathogenesis-related microRNAs in hepatocellular carcinoma by expression profiling.')]
42	mir-18b	33372376	TRUE	5	[('33318478', 'SOX9-activated FARSA-AS1 predetermines cell growth, stemness, and metastasis in colorectal cancer through upregulating FARSA and SOX9.')]	[('33372376', 'Long noncoding RNA small nucleolar RNA host gene 15 deteriorates liver cancer via microRNA-18b-5p/LIM-only 4 axis.'), ('23496901', 'The expression level of miR-18b in hepatocellular carcinoma is associated with the grade of malignancy and prognosis.'), ('23205106', 'Identification of pathogenesis-related microRNAs in hepatocellular carcinoma by expression profiling.'), ('21876625',…
43	mir-365a		FALSE	1	[('30809309', 'LINC01554-Mediated Glucose Metabolism Reprogramming Suppresses Tumorigenicity in Hepatocellular Carcinoma via Downregulating PKM2 Expression and Inhibiting Akt/mTOR Signaling Pathway.')]	[]
44	mir-664a	29898735	TRUE	1	[('29898735', 'MicroRNA-644a promotes apoptosis of hepatocellular carcinoma cells by downregulating the expression of heat shock factor 1.')]	[]
45	let-7f		FALSE	9	[('32305960', 'Hypoxia-induced let-7f-5p/TARBP2 feedback loop regulates osteosarcoma cell proliferation and invasion by inhibiting the Wnt signaling pathway.'), ('21035526', 'Circulating microRNAs, possible indicators of progress of rat hepatocarcinogenesis from early stages.')]	[('33303811', 'Comprehensive analysis of liver and blood miRNA in precancerous conditions.'), ('32102538', 'Serum microRNA let-7a-1/let-7d/let-7f and miRNA 143/145 Gene Expression Profiles as Potential Biomarkers in HCV Induced Hepatocellular Carcinoma.'), ('30536673', 'microRNAs: Key players in virus-associated hepatocellular carcinoma.'), ('27080237', 'Stratification of Digestive Cancers with D…
46	mir-646		FALSE	2	[]	[('32196384', 'Long Noncoding MT1JP Enhanced the Inhibitory Effects of miR-646 on FGF2 in Osteosarcoma.'), ('25177719', 'Association between a variant in microRNA-646 and the susceptibility to hepatocellular carcinoma in a large-scale population.')]
47	mir-208a		FALSE	0	[]	[]
48	mir-193a	34730679	TRUE	20	[('34730679', 'CircRNA has_circ_0001806 promotes hepatocellular carcinoma progression via the miR-193a-5p/MMP16 pathway.'), ('32095323', 'Downregulation of miR-193a-3p is involved in the pathogenesis of hepatocellular carcinoma by targeting CCND1.'), ('31799651', 'Long noncoding RNA ZFAS1 promotes hepatocellular carcinoma proliferation by epigenetically repressing miR-193a-3p.'), ('31210353', 'In…	[('35165519', 'Mig-6 Inhibits Autophagy in HCC Cell Lines by Modulating miR-193a-3p.'), ('32960907', 'Circulating levels of microRNA193a-5p predict outcome in early stage hepatocellular carcinoma.'), ('31320713', 'Circulating microRNAs as Potential Diagnostic and Prognostic Biomarkers in Hepatocellular Carcinoma.'), ('28036298', 'Clinical and biological significance of miR-23b and miR-193a in hum…
49	mir-369	34979376	TRUE	6	[('34979376', 'MiR-369-5p inhibits the proliferation and migration of hepatocellular carcinoma cells by down-regulating HOXA13 expression.'), ('34794217', '[Molecular mechanism of miR-369-3p regulating hepatocellular carcinoma cell proliferation and apoptosis by targeting ACTN4].'), ('33854606', 'miR-369 inhibits Liver Cancer progression by targeting ZEB1 pathway and predicts the prognosis of HCC…	[('26850373', 'Serum miRNAs as predictive and preventive biomarker for pre-clinical hepatocellular carcinoma.')]
50	mir-572	30317540	TRUE	2	[('30317540', 'The competing endogenous circular RNA ADAMTS14 suppressed hepatocellular carcinoma progression through regulating microRNA-572/regulator of calcineurin 1.')]	[('28651018', 'Meta-analysis of miRNA expression profiles for prostate cancer recurrence following radical prostatectomy.')]
51	mir-378a	35184646	TRUE	15	[('35184646', 'microRNA-378a-3p regulates the progression of hepatocellular carcinoma by regulating PD-L1 and STAT3.'), ('34795209', 'Inhibition of DTYMK significantly restrains the growth of HCC and increases sensitivity to oxaliplatin.'), ('34788772', 'Sea cucumber peptides inhibit the malignancy of NSCLC by regulating miR-378a-5p targeted TUSC2.'), ('34749775', 'DNMT1-induced miR-378a-3p silen…	[('34869393', 'CircCRIM1 Promotes Hepatocellular Carcinoma Proliferation and Angiogenesis by Sponging miR-378a-3p and Regulating SKP2 Expression.'), ('33634974', 'MiR-378a-3p as a putative biomarker for hepatocellular carcinoma diagnosis and prognosis: Computational screening with experimental validation.'), ('31545228', 'Enhancement of anticancer activity of docetaxel by combination with Fuzheng…
52	mir-339	30774308	TRUE	7	[('30774308', 'MicroRNA-339 inhibits human hepatocellular carcinoma proliferation and invasion via targeting ZNF689.'), ('26640557', 'Bafilomycin A1 inhibits the growth and metastatic potential of the BEL-7402 liver cancer and HO-8910 ovarian cancer cell lines and induces alterations in their microRNA expression.'), ('25404690', 'microRNA-339-5p modulates Na+/I- symporter-mediated radioiodide upt…	[('30462625', 'miR-339-5p Increases Radiosensitivity of Lung Cancer Cells by Targeting Phosphatases of Regenerating Liver-1 (PRL-1).'), ('28275578', 'MicroRNAs for the Prediction of Early Response to Sorafenib Treatment in Human Hepatocellular Carcinoma.'), ('26186881', 'Effects of miR-339-5p on invasion and prognosis of hepatocellular carcinoma.')]
53	mir-651		FALSE	1	[]	[('35386284', 'Identification of lncRNA/circRNA-miRNA-mRNA ceRNA Network as Biomarkers for Hepatocellular Carcinoma.')]
54	mir-2116		FALSE	1	[]	[('23205106', 'Identification of pathogenesis-related microRNAs in hepatocellular carcinoma by expression profiling.')]
55	mir-191	31334580	TRUE	9	[('31972611', 'Oncomir MicroRNA-346 Is Upregulated in Colons of Patients With Primary Sclerosing Cholangitis.'), ('31334580', 'MicroRNA-191 promotes hepatocellular carcinoma cell proliferation by has_circ_0000204/miR-191/KLF6 axis.'), ('31153371', 'Circular RNA circTRIM33-12 acts as the sponge of MicroRNA-191 to suppress hepatocellular carcinoma progression.'), ('30249208', 'Knockdown long non-co…	[('25814782', 'Identification of endogenous controls for analyzing serum exosomal miRNA in patients with hepatitis B or hepatocellular carcinoma.')]
56	mir-365b	30943053	TRUE	2	[('30943053', 'miRNA-365b promotes hepatocellular carcinoma cell migration and invasion by downregulating SGTB.')]	[('28012864', 'Germline and somatic DICER1 mutations in familial and sporadic liver tumors.')]
57	mir-99a	28624790	TRUE	13	[('28624790', 'Co-targeting of IGF1R/mTOR pathway by miR-497 and miR-99a impairs hepatocellular carcinoma development.'), ('28387375', 'PLGA-based dual targeted nanoparticles enhance miRNA transfection efficiency in hepatic carcinoma.'), ('26640557', 'Bafilomycin A1 inhibits the growth and metastatic potential of the BEL-7402 liver cancer and HO-8910 ovarian cancer cell lines and induces alterati…	[('34989596', 'Circulating MicroRNAs, Polychlorinated Biphenyls, and Environmental Liver Disease in the Anniston Community Health Survey.'), ('33575116', 'Comprehensive analysis to identify DLEU2L/TAOK1 axis as a prognostic biomarker in hepatocellular carcinoma.'), ('33274225', 'Investigation of the miRNA and mRNA Coexpression Network and Their Prognostic Value in Hepatocellular Carcinoma.'), ('3…
58	mir-502	35048790	TRUE	8	[('35048790', 'Circular RNA SOX5 promotes the proliferation and inhibits the apoptosis of the hepatocellular carcinoma cells by targeting miR-502-5p/synoviolin 1 axis.'), ('33234142', 'CircSOD2 induced epigenetic alteration drives hepatocellular carcinoma progression through activating JAK2/STAT3 signaling pathway.'), ('31000195', 'A novel circular RNA circ-ZNF652 promotes hepatocellular carcinom…	[('35340237', 'Bioinformatics Methods Reveal the Biomarkers and the miRNA-mRNA Network in Hepatocellular Carcinoma.'), ('22095217', "A polymorphism at the miR-502 binding site in the 3'-untranslated region of the histone methyltransferase SET8 is associated with hepatocellular carcinoma outcome.")]
59	mir-765	33401249	TRUE	6	[('35648115', 'TRG16, targeted by miR-765, inhibits breast cancer stem cell-like properties via regulating the NF-kappaB pathway.'), ('33401249', 'Exosomal linc-FAM138B from cancer cells alleviates hepatocellular carcinoma progression via regulating miR-765.'), ('31693242', 'Clinical value of LHPP-associated microRNAs combined with protein induced by vitamin K deficiency or antagonist-II in the d…	[('32404854', 'Clinical Value of Serum LHPP-associated miR-765 in the Prognosis of Laparoscopic or Open Hepatectomy for Hepatocellular Carcinoma.'), ('30854869', 'Forms of diagnostic material as sources of miRNA biomarkers in hepatocellular carcinoma: a preliminary study.')]
60	mir-24-2	23649631	TRUE	1	[('23649631', 'c-MYC-regulated miR-23a/24-2/27a cluster promotes mammary carcinoma cell invasion and hepatic metastasis by targeting Sprouty2.')]	[]
61	mir-571		FALSE	1	[('25070813', 'Genome-wide analysis of genetic variations assisted by Ingenuity Pathway Analysis to comprehensively investigate potential genetic targets associated with the progression of hepatocellular carcinoma.')]	[]
62	mir-1269a	28081866	TRUE	8	[('28081866', 'A single nucleotide variant in microRNA-1269a promotes the occurrence and process of hepatocellular carcinoma by targeting to oncogenes SPATS2L and LRP6.')]	[('35252180', 'miR-1269a and miR-1269b: Emerging Carcinogenic Genes of the miR-1269 Family.'), ('35243101', 'Identification of potential microRNA groups for the diagnosis of hepatocellular carcinoma (HCC) using microarray datasets and bioinformatics tools.'), ('35174066', 'Profiling and Integrated Analysis of Differentially Expressed MicroRNAs as Novel Biomarkers of Hepatocellular Carcinoma.'), (…
63	mir-421	35400271	TRUE	17	[('35400271', 'CircSEC24A (hsa_circ_0003528) interference suppresses epithelial-mesenchymal transition of hepatocellular carcinoma cells via miR-421/MMP3 axis.'), ('34847369', 'Hsa_circ_0007059 sponges miR-421 to repress cell growth and stemness in hepatocellular carcinoma by the PTEN-AKT/mTOR pathway.'), ('34153299', 'CRNDE-h transcript/miR-136-5p axis regulates interleukin enhancer binding fact…	[('35174066', 'Profiling and Integrated Analysis of Differentially Expressed MicroRNAs as Novel Biomarkers of Hepatocellular Carcinoma.'), ('34148185', 'ceRNA network development and tumor-infiltrating immune cell analysis in hepatocellular carcinoma.'), ('33433806', 'Lidocaine Inhibits Hepatocellular Carcinoma Development by Modulating circ_ITCH/miR-421/CPEB3 Axis.'), ('32301252', 'Longitudinal …
64	mir-186	34665488	TRUE	20	[('34986537', 'Resveratrol inhibits the migration, invasion and epithelial-mesenchymal transition in liver cancer cells through up- miR-186-5p expression.'), ('34665488', 'LINC01291 promotes hepatocellular carcinoma development by targeting the miR-186-5p/OXSR1 axis.'), ('33880589', 'circ-PRKCI targets miR-1294 and miR-186-5p by downregulating FOXK1 expression to suppress glycolysis in hepatocell…	[('35573701', 'Bioinformatics Study Revealed Significance of Exosome Transcriptome in Hepatocellular Carcinoma Diagnosis.'), ('35031872', 'miRNAs derived from plasma small extracellular vesicles predict organo-tropic metastasis of gastric cancer.'), ('34708048', 'A Review on the Carcinogenic Roles of DSCAM-AS1.'), ('33816273', 'miR-186 Inhibits Liver Cancer Stem Cells Expansion via Targeting PTPN…
65	mir-181c	34097562	TRUE	4	[('34097562', 'ZSCAN16-AS1 expedites hepatocellular carcinoma progression via modulating the miR-181c-5p/SPAG9 axis to activate the JNK pathway.'), ('31114379', 'MicroRNA181c suppresses growth and metastasis of hepatocellular carcinoma by modulating NCAPG.'), ('27061051', 'beta-ionone modulates the expression of miRNAs and genes involved in the metastatic phenotype of microdissected persistent pr…	[('28218475', 'Profound changes in miRNA expression during cancer initiation by aflatoxin B1 and their abrogation by the chemopreventive triterpenoid CDDO-Im.')]
66	mir-495	34516334	TRUE	11	[('34516334', 'MicroRNA miR-495 regulates the development of Hepatocellular Carcinoma by targeting C1q/tumor necrosis factor-related protein-3 (CTRP3).'), ('32171324', 'MicroRNA-495 confers inhibitory effects on cancer stem cells in oral squamous cell carcinoma through the HOXC6-mediated TGF-beta signaling pathway.'), ('31312355', 'ZNF503 accelerates aggressiveness of hepatocellular carcinoma cel…	[('34806748', 'Bioinformatics analysis of tumor-educated platelet microRNAs in patients with hepatocellular carcinoma.'), ('34225433', '[Expression of miR-495 and its effect on MHCC-97H hepatocellular carcinoma cells].'), ('33102579', 'Four Autophagy-Related lncRNAs Predict the Prognosis of HCC through Coexpression and ceRNA Mechanism.')]
67	mir-576		FALSE	0	[]	[]
68	mir-365a		FALSE	1	[('30809309', 'LINC01554-Mediated Glucose Metabolism Reprogramming Suppresses Tumorigenicity in Hepatocellular Carcinoma via Downregulating PKM2 Expression and Inhibiting Akt/mTOR Signaling Pathway.')]	[]
69	let-7f-1		FALSE	1	[]	[('32102538', 'Serum microRNA let-7a-1/let-7d/let-7f and miRNA 143/145 Gene Expression Profiles as Potential Biomarkers in HCV Induced Hepatocellular Carcinoma.')]
70	mir-941		FALSE	3	[('28895405', 'Screening key miRNAs for human hepatocellular carcinoma based on miRNA-mRNA functional synergistic network.'), ('25049231', 'DNA methylation-mediated repression of miR-941 enhances lysine (K)-specific demethylase 6B expression in hepatoma cells.')]	[('33133386', 'Blood exosomal micro ribonucleic acid profiling reveals the complexity of hepatocellular carcinoma and identifies potential biomarkers for differential diagnosis.')]
71	mir-675	23864307	TRUE	13	[('34780054', 'Role of miR-653 and miR-29c in downregulation of CYP1A2 expression in hepatocellular carcinoma.'), ('34409922', 'Oncogenic role of early growth response-1 in liver cancer through the regulation of the microRNA-675/sestrin 3 and the Wnt/beta-catenin signaling pathway.'), ('34236149', 'The EGFR-P38 MAPK axis up-regulates PD-L1 through miR-675-5p and down-regulates HLA-ABC via hexokin…	[('35201458', 'Interaction of microRNAs with sphingosine kinases, sphingosine-1 phosphate, and sphingosine-1 phosphate receptors in cancer.'), ('33499244', 'The lncRNA H19-Derived MicroRNA-675 Promotes Liver Necroptosis by Targeting FADD.'), ('32429417', 'The Good, the Bad, the Question-H19 in Hepatocellular Carcinoma.'), ('27644634', 'MiR-675 Promotes the Growth of Hepatocellular Carcinoma Cells…
72	mir-3607	33588071	TRUE	4	[('33588071', 'XIAP, commonly targeted by tumor suppressive miR-3607-5p and miR-3607-3p, promotes proliferation and inhibits apoptosis in hepatocellular carcinoma.'), ('32404179', 'Dysregulation of miR-3607 predicts prognosis of hepatocellular carcinoma and regulates tumor cell proliferation, migration and invasion.')]	[('32311821', 'miR-3607, a biomarker of hepatocellular carcinoma invasion and aggressiveness: Its relationship with epithelial-mesenchymal transition process.'), ('30186744', 'Comprehensive analysis of key genes, microRNAs and long non-coding RNAs in hepatocellular carcinoma.')]
73	mir-425	28423650	TRUE	14	[('35278064', 'Downregulation of ZC3H13 by miR-362-3p/miR-425-5p is associated with a poor prognosis and adverse outcomes in hepatocellular carcinoma.'), ('34153299', 'CRNDE-h transcript/miR-136-5p axis regulates interleukin enhancer binding factor 2 expression to promote hepatocellular carcinoma cell proliferation.'), ('31931030', 'Exosome-encapsulated miRNAs contribute to CXCL12/CXCR4-induced l…	[('33852640', 'MiR-30a and miR-200c differentiate cholangiocarcinomas from gastrointestinal cancer liver metastases.'), ('33274225', 'Investigation of the miRNA and mRNA Coexpression Network and Their Prognostic Value in Hepatocellular Carcinoma.'), ('33123581', 'miR-425-5p Acts as a Molecular Marker and Promoted Proliferation, Migration by Targeting RNF11 in Hepatocellular Carcinoma.'), ('250403…
74	mir-95	27698442	TRUE	7	[('32418767', 'MicroRNA-95-3p inhibits cell proliferation and metastasis in colorectal carcinoma by HDGF.'), ('27698442', 'Up-regulation of miR-95-3p in hepatocellular carcinoma promotes tumorigenesis by targeting p21 expression.')]	[('30064138', 'Identifying Differentially Expressed MicroRNAs Between Cirrhotic and Non-Cirrhotic Hepatocellular Carcinoma and Exploring Their Functions Using Bioinformatic Analysis.'), ('27275163', 'The Liver MicroRNA Expression Profiles Associated With Chronic Hepatitis C Virus (HCV) Genotype-4 Infection: A Preliminary Study.'), ('25217977', 'Induction of cancer-related microRNA expression prof…
75	mir-1180	27044843	TRUE	9	[('34307154', 'Transcription Factors and Methylation Drive Prognostic miRNA Dysregulation in Hepatocellular Carcinoma.'), ('32660176', '[Integrated analysis of DNA methylation and gene expression profiles of hepatocellular carcinoma to construct miR-1180-3p relevant ceRNA regulatory network].'), ('30052636', 'Characterization of hepatocellular adenoma and carcinoma using microRNA profiling and ta…	[('32961635', 'Identification of modules and novel prognostic biomarkers in liver cancer through integrated bioinformatics analysis.'), ('32665670', 'Clinical significance of miR-1180-3p in hepatocellular carcinoma: a study based on bioinformatics analysis and RT-qPCR validation.'), ('29123978', 'Deep sequencing and comprehensive expression analysis identifies several molecules potentially relate…
76	mir-4787		FALSE	20	[('35651333', 'Melatonin inhibits glycolysis in hepatocellular carcinoma cells by downregulating mitochondrial respiration and mTORC1 activity.'), ('35648115', 'TRG16, targeted by miR-765, inhibits breast cancer stem cell-like properties via regulating the NF-kappaB pathway.')]	[('35654476', 'Stereotactic radiofrequency ablation as a valid first-line treatment option for hepatocellular adenomas.'), ('35652419', 'Comparison of nivolumab and sorafenib for first systemic therapy in patients with hepatocellular carcinoma and Child-Pugh B cirrhosis.'), ('35652264', 'A Functional Screening Identifies a New Organic Selenium Compound Targeting Cancer Stem Cells: Role of c-Myc T…
77	mir-30d	20054866	TRUE	10	[('30804330', 'Glycine decarboxylase induces autophagy and is downregulated by miRNA-30d-5p in hepatocellular carcinoma.'), ('28440426', 'Downregulation of microRNA-30d promotes cell proliferation and invasion by targeting LRH-1 in colorectal carcinoma.'), ('28381192', 'Downregulation of sorting nexin 10 is associated with overexpression of miR-30d during liver cancer progression in rats.'), ('27…	[('32724415', 'Comprehensive analysis of circulating microRNAs as predictive biomarkers for sorafenib therapy outcome in hepatocellular carcinoma.'), ('30542726', 'Exosomal microRNAs as potential biomarkers for cancer cell migration and prognosis in hepatocellular carcinoma patient-derived cell models.'), ('26046780', 'A Seven-microRNA Expression Signature Predicts Survival in Hepatocellular Carc…
78	mir-663b		FALSE	2	[]	[('33465419', 'Expression of miR-18a-5p, miR-144-3p, and miR-663b in colorectal cancer and their association with cholesterol homeostasis.'), ('32369692', 'Molecular Pathways Leading to Induction of Cell Death and Anti-Proliferative Properties by Tacrolimus and mTOR Inhibitors in Liver Cancer Cells.')]
79	mir-1285	31854049	TRUE	4	[('31854049', 'MiR-1285-5p/TMEM194A axis affects cell proliferation in breast cancer.'), ('28253715', 'MicroRNA-1285 inhibits malignant biological behaviors of human pancreatic cancer cells by negative regulation of YAP1.'), ('25230788', 'miR-1285-3p acts as a potential tumor suppressor miRNA via downregulating JUN expression in hepatocellular carcinoma.')]	[('27554417', 'Diagnosis of HCC for patients with cirrhosis using miRNA profiles of the tumor-surrounding tissue - A statistical model based on stepwise penalized logistic regression.')]
80	mir-191	31334580	TRUE	9	[('31972611', 'Oncomir MicroRNA-346 Is Upregulated in Colons of Patients With Primary Sclerosing Cholangitis.'), ('31334580', 'MicroRNA-191 promotes hepatocellular carcinoma cell proliferation by has_circ_0000204/miR-191/KLF6 axis.'), ('31153371', 'Circular RNA circTRIM33-12 acts as the sponge of MicroRNA-191 to suppress hepatocellular carcinoma progression.'), ('30249208', 'Knockdown long non-co…	[('25814782', 'Identification of endogenous controls for analyzing serum exosomal miRNA in patients with hepatitis B or hepatocellular carcinoma.')]
81	mir-215		FALSE	20	[('33173413', 'Interactome analysis of gene expression profiles identifies CDC6 as a potential therapeutic target modified by miR-215-5p in hepatocellular carcinoma.'), ('31297882', 'Insight into the molecular mechanism of LINC00152/miR-215/CDK13 axis in hepatocellular carcinoma progression.'), ('29187907', 'Long non-coding RNA UICLM promotes colorectal cancer liver metastasis by acting as a ceRN…	[('35473687', 'Role of let7-g and miR-221 level as potential predictors for overall survival of hepatocellular carcinoma patients.'), ('34629898', 'The Mutation and Expression Level of LRP1B are Associated with Immune Infiltration and Prognosis in Hepatocellular Carcinoma.'), ('34343125', 'Role of circulating microRNA-21 and microRNA-215 in the diagnosis of hepatitis C related hepatocellular carc…
82	mir-942	34376644, 31632084	TRUE	7	[('34997317', 'SOX2-OT induced by PAI-1 promotes triple-negative breast cancer cells metastasis by sponging miR-942-5p and activating PI3K/Akt signaling.'), ('34376644', 'Telocytes promote hepatocellular carcinoma by activating the ERK signaling pathway and miR-942-3p/MMP9 axis.'), ('32856218', 'Overexpression of circ_0001445 decelerates hepatocellular carcinoma progression by regulating miR-942-…	[('33603784', 'Identification of a Novel Metastasis-Related miRNAs-Based Signature for Predicting the Prognosis of Hepatocellular Carcinoma.'), ('31046434', 'MiR-942-3p Promotes the Proliferation and Invasion of Hepatocellular Carcinoma Cells by Targeting MBL2.')]
83	mir-500b		FALSE	0	[]	[]
84	mir-181d	20023698	TRUE	6	[('20023698', 'TGFbeta-mediated upregulation of hepatic miR-181b promotes hepatocarcinogenesis by targeting TIMP3.')]	[('30416681', 'LncRNAs as novel players in hepatocellular carcinoma recurrence.'), ('27080237', 'Stratification of Digestive Cancers with Different Pathological Features and Survival Outcomes by MicroRNA Expression.'), ('26939869', 'Distinct miRNA profiles in normal and gastric cancer myofibroblasts and significance in Wnt signaling.'), ('24314246', '[Morphology and microRNA expression profiles o…
85	mir-216a	30556161	TRUE	12	[('33021963', 'MicroRNA-216a-3p promotes sorafenib sensitivity in hepatocellular carcinoma by downregulating MAPK14 expression.'), ('30556161', 'lncRNA A1BG-AS1 suppresses proliferation and invasion of hepatocellular carcinoma cells by targeting miR-216a-5p.'), ('30430564', 'DANCR contributed to hepatocellular carcinoma malignancy via sponging miR-216a-5p and modulating KLF12.'), ('29177609', 'Di…	[('34038612', 'Identification of microRNA-96-5p as a postoperative, prognostic microRNA predictor in nonviral hepatocellular carcinoma.'), ('33813720', 'An Integrated Data Analysis of mRNA, miRNA and Signaling Pathways in Pancreatic Cancer.'), ('29997205', 'Transduction with Lentiviral Vectors Altered the Expression Profile of Host MicroRNAs.')]
86	mir-548l		FALSE	1	[('28218742', 'MiRNA expression profiles reveal the involvement of miR-26a, miR-548l and miR-34a in hepatocellular carcinoma progression through regulation of ST3GAL5.')]	[]
87	mir-335	35438846, 35287604	TRUE	19	[('35438846', 'MicroRNA-139-5p negatively regulates NME1 expression in hepatocellular carcinoma cells.'), ('35287604', 'Circ_0064288 acts as an oncogene of hepatocellular carcinoma cells by inhibiting miR-335-5p expression and promoting ROCK1 expression.'), ('34081622', 'Construction of a novel mRNA-miRNA-lncRNA network and identification of potential regulatory axis associated with prognosis in …	[('35651814', 'Implication of miR-122, miR-483, and miR-335 Expression Levels as Potential Signatures in HCV-Related Hepatocellular Carcinoma (HCC) in Egyptian Patients.'), ('34233850', 'Key factors and potential drug combinations of nonalcoholic steatohepatitis: Bioinformatic analysis and experimental validation-based study.'), ('32191537', 'LncRNA FOXD3-AS1 Mediates AKT Pathway to Promote Growt…
88	mir-24-1	28499244	TRUE	3	[('28499244', 'MicroRNA-24-1 suppresses mouse hepatoma cell invasion and metastasis via directly targeting O-GlcNAc transferase.')]	[('35379158', 'The Identification and Analysis of MicroRNAs Combined Biomarkers for Hepatocellular Carcinoma Diagnosis.'), ('28243631', 'Identifying microRNA panels specifically associated with hepatocellular carcinoma and its different etiologies.')]
89	mir-218-1		FALSE	0	[]	[]
90	mir-409	30657556	TRUE	2	[('30657556', 'miR-409 down-regulates Jak-Stat pathway to inhibit progression of liver cancer.')]	[('27282650', 'Identification of circulating microRNAs during the liver neoplastic process in a murine model of hereditary tyrosinemia type 1.')]
91	mir-526b	33843021	TRUE	5	[('34135394', 'Mutant p53s and chromosome 19 microRNA cluster overexpression regulate cancer testis antigen expression and cellular transformation in hepatocellular carcinoma.'), ('33843021', 'Long non-coding RNA HOTAIR promotes hepatocellular carcinoma progression by regulating miR-526b-3p/DHX33 axis.'), ('32116112', 'Oncogenic hsa_circ_0091581 promotes the malignancy of HCC cell through blockin…	[('33116877', 'CircRNA circUGGT2 Contributes to Hepatocellular Carcinoma Development via Regulation of the miR-526b-5p/RAB1A Axis.')]
92	mir-637	30720164	TRUE	8	[('34374933', 'Upregulation of lncRNA NIFK-AS1 in hepatocellular carcinoma by m(6)A methylation promotes disease progression and sorafenib resistance.'), ('33123285', 'Identification of hsa_circ_0039053 as an up-regulated and oncogenic circRNA in hepatocellular carcinoma via the miR-637-mediated USP21 activation.'), ('30720164', 'MiR-637 inhibits proliferation and invasion of hepatoma cells by ta…	[('35205327', 'MiR-612, miR-637, and miR-874 can Regulate VEGFA Expression in Hepatocellular Carcinoma Cell Lines.'), ('28651018', 'Meta-analysis of miRNA expression profiles for prostate cancer recurrence following radical prostatectomy.')]
93	mir-376a	22684007	TRUE	7	[('34095464', 'SNHG1 knockdown upregulates miR-376a and downregulates FOXK1/Snail axis to prevent tumor growth and metastasis in HCC.'), ('32795656', 'The combination of coffee compounds attenuates early fibrosis-associated hepatocarcinogenesis in mice: involvement of miRNA profile modulation.'), ('25613642', 'MiR-376a and histone deacetylation 9 form a regulatory circuitry in hepatocellular carc…	[('33398718', 'Pseudogene Annexin A2 Pseudogene 1 Contributes to Hepatocellular Carcinoma Progression by Modulating Its Parental Gene ANXA2 via miRNA-376a-3p.'), ('32369692', 'Molecular Pathways Leading to Induction of Cell Death and Anti-Proliferative Properties by Tacrolimus and mTOR Inhibitors in Liver Cancer Cells.'), ('31078148', 'Clinical significance of HDAC9 in hepatocellular carcinoma.')]
94	mir-502	35048790	TRUE	8	[('35048790', 'Circular RNA SOX5 promotes the proliferation and inhibits the apoptosis of the hepatocellular carcinoma cells by targeting miR-502-5p/synoviolin 1 axis.'), ('33234142', 'CircSOD2 induced epigenetic alteration drives hepatocellular carcinoma progression through activating JAK2/STAT3 signaling pathway.'), ('31000195', 'A novel circular RNA circ-ZNF652 promotes hepatocellular carcinom…	[('35340237', 'Bioinformatics Methods Reveal the Biomarkers and the miRNA-mRNA Network in Hepatocellular Carcinoma.'), ('22095217', "A polymorphism at the miR-502 binding site in the 3'-untranslated region of the histone methyltransferase SET8 is associated with hepatocellular carcinoma outcome.")]
95	mir-652		FALSE	3	[('34608826', 'Upregulation of microRNA miR-652-3p is a prognostic risk factor for hepatocellular carcinoma and regulates cell proliferation, migration, and invasion.'), ('26498682', 'MiR-652 inhibits acidic microenvironment-induced epithelial-mesenchymal transition of pancreatic cancer cells by targeting ZEB1.'), ('21035526', 'Circulating microRNAs, possible indicators of progress of rat hepatoc…	[]
96	mir-595	32107085	TRUE	2	[('32107085', 'miR-595 suppresses cell proliferation and metastasis in hepatocellular carcinoma by inhibiting NF-kappaB signalling pathway.')]	[('26509672', 'Circulating microRNAs, miR-939, miR-595, miR-519d and miR-494, Identify Cirrhotic Patients with HCC.')]
97	mir-328	31773692	TRUE	12	[('34016787', 'LncRNA LOC146880 promotes esophageal squamous cell carcinoma progression via miR-328-5p/FSCN1/MAPK axis.'), ('32228643', 'Upregulation of microRNA-328-3p by hepatitis B virus contributes to THLE-2 cell injury by downregulating FOXO4.'), ('32142853', 'MiR-328-3p inhibits cell proliferation and metastasis in colorectal cancer by targeting Girdin and inhibiting the PI3K/Akt signaling …	[('32547226', 'Long Noncoding RNA DIO3OS Hinders Cell Malignant Behaviors of Hepatocellular Carcinoma Cells Through the microRNA-328/Hhip Axis.'), ('31148183', 'A Noncoding Regulatory RNAs Network Driven by Circ-CDYL Acts Specifically in the Early Stages Hepatocellular Carcinoma.'), ('28415718', 'Exosomal microRNAs isolated from plasma of mesenteric veins linked to liver metastases in resected pa…
98	mir-664b		TRUE	1	[('30229820', 'The increase of miR-27a affects the role of cisplatin on proliferation and migration capacities of liver cancer cells.')]	[]
99	mir-103a-2		FALSE	0	[]	[]
100	mir-573		FALSE	0	[]	[]
101	mir-335	35438846, 35287604	TRUE	19	[('35438846', 'MicroRNA-139-5p negatively regulates NME1 expression in hepatocellular carcinoma cells.'), ('35287604', 'Circ_0064288 acts as an oncogene of hepatocellular carcinoma cells by inhibiting miR-335-5p expression and promoting ROCK1 expression.'), ('34081622', 'Construction of a novel mRNA-miRNA-lncRNA network and identification of potential regulatory axis associated with prognosis in …	[('35651814', 'Implication of miR-122, miR-483, and miR-335 Expression Levels as Potential Signatures in HCV-Related Hepatocellular Carcinoma (HCC) in Egyptian Patients.'), ('34233850', 'Key factors and potential drug combinations of nonalcoholic steatohepatitis: Bioinformatic analysis and experimental validation-based study.'), ('32191537', 'LncRNA FOXD3-AS1 Mediates AKT Pathway to Promote Growt…
102	mir-432	35543347	TRUE	6	[('35543347', 'Circular RNA circRNA-0039459 promotes the migration, invasion, and proliferation of liver cancer cells through the adsorption of miR-432.'), ('33675609', 'Circular RNA circ_0021093 regulates miR-432/Annexin A2 pathway to promote hepatocellular carcinoma progression.'), ('30086881', 'Overexpression of circular RNA circ_001569 indicates poor prognosis in hepatocellular carcinoma and …	[('24592541', 'MicroRNA expression profiles of circulating microvesicles in hepatocellular carcinoma.'), ('22629365', 'Identification of postoperative prognostic microRNA predictors in hepatocellular carcinoma.')]
103	mir-888	30915745	TRUE	3	[('30915745', 'MiR-888 promotes cell migration and invasion of hepatocellular carcinoma by targeting SMAD4.'), ('28337887', 'Up-regulation of miR-888-5p in hepatocellular carcinoma cell lines and its effect on malignant characteristics of cells.')]	[('35473892', 'Differences Between Sorafenib and Lenvatinib Treatment from Genetic and Clinical Perspectives for Patients with Hepatocellular Carcinoma.')]
104	mir-885	32937160	TRUE	17	[('32937160', 'MicroRNA-885 regulates the growth and epithelial mesenchymal transition of human liver cancer cells by suppressing tropomodulin 1 expression.'), ('31119791', 'miR-885-5p plays an accomplice role in liver cancer by instigating TIGAR expression via targeting its promoter.'), ('28460469', 'Identification of microRNA 885-5p as a novel regulator of tumor metastasis by targeting CPEB2 in…	[('35234251', 'MicroRNAs as messengers of liver diseases: has the message finally been decrypted?'), ('33040799', 'Serum miR-885-5p can be used as a marker for efficacy prediction and prognosis of advanced liver cancer.'), ('33015376', 'Circulating microRNAs associated with liver fibrosis in chronic hepatitis C patients.'), ('32099401', 'MicroRNA 885-5p Inhibits Hepatocellular Carcinoma Metastasi…
105	mir-1228	25422913	TRUE	6	[('25422913', 'miR-1228 promotes the proliferation and metastasis of hepatoma cells through a p53 forward feedback loop.')]	[('31421050', 'Role of CircRNAs_100395 in Proliferation and Metastases of Liver Cancer.'), ('26509672', 'Circulating microRNAs, miR-939, miR-595, miR-519d and miR-494, Identify Cirrhotic Patients with HCC.'), ('25238238', 'A serum microRNA panel as potential biomarkers for hepatocellular carcinoma related with hepatitis B virus.'), ('24488924', 'Human miR-1228 as a stable endogenous control for t…
106	mir-449b	28088579	TRUE	2	[('28088579', 'The microRNA-449 family inhibits TGF-beta-mediated liver cancer cell migration by targeting SOX4.')]	[('28651018', 'Meta-analysis of miRNA expression profiles for prostate cancer recurrence following radical prostatectomy.')]
107	mir-450b		FALSE	0	[]	[]
108	mir-450b		FALSE	0	[]	[]
109	mir-208b		FALSE	0	[]	[]
110	mir-34b		FALSE	20	[('28098861', 'Triptolide inhibits viability and induces apoptosis in liver cancer cells through activation of the tumor suppressor gene p53.'), ('27808368', 'Association between polymorphisms in the promoter region of pri-miR-34b/c and risk of hepatocellular carcinoma.'), ('25475831', 'Association between rs4938723 functional polymorphism in the promoter region of miR-34b/c gene and cancer risk.…	[('35485699', 'Association between Genetic Polymorphisms in MicroRNAs 196a2 (rs11614913) and 34 b/c (rs4938723) and Risk of Hepatocellular Carcinoma in Egyptian Patients.'), ('34155346', 'Whole-transcriptome and proteome analyses identify key differentially expressed mRNAs, miRNAs, lncRNAs and circRNAs associated with HCC.'), ('32166848', 'Association of TP53 rs1042522 C>G and miR-34b/c rs4938723…
111	mir-1234		FALSE	0	[]	[]
112	mir-93	34435526	TRUE	20	[('34435526', 'miR-93-5p knockdown repressed hepatocellular carcinoma progression via increasing ERBB4 and TETs-dependent DNA demethylation.'), ('33831356', 'miR-93 regulates liver tumor initiating cells expansion and predicts chemotherapeutic response of patients.'), ('33760164', 'miR-93-5p promotes insulin resistance to regulate type 2 diabetes progression in HepG2 cells by targeting HGF.'), ('…	[('35377979', 'MiR-93-5P Represses the Gluconeogenesis of Hepatocellular Carcinoma while Boosting Its Glycolysis and Malignant Progression by Suppressing PCK1.'), ('35037761', 'Prognostic potential of circulating miR-93-5p in patients with colorectal cancer liver metastases.'), ('34175168', 'Urine miR-93-5p is a promising biomarker for early detection of HBV-related hepatocellular carcinoma.'), (…
113	mir-490	32831914	TRUE	20	[('33094503', 'miR-490: A potential biomarker and therapeutic target in cancer and other diseases.'), ('32831914', 'MicroRNA-490-3p suppresses the proliferation and invasion of hepatocellular carcinoma cells via targeting TMOD3.'), ('32190151', 'MicroRNA-490-3p suppresses hepatocellular carcinoma cell proliferation and migration by targeting the aurora kinase A gene (AURKA).'), ('31920461', 'LncR…	[('32673066', 'Circular RNA circ_0091579 Promotes Hepatocellular Carcinoma Proliferation, Migration, Invasion, and Glycolysis Through miR-490-5p/CASC3 Axis.'), ('31858324', 'RP11-81H3.2 Acts as an Oncogene via microRNA-490-3p Inhibition and Consequential Tankyrase 2 Up-Regulation in Hepatocellular Carcinoma.'), ('30007991', 'Investigation of miR-490-3p Expression in Hepatocellular Carcinoma Based…
114	mir-500b		FALSE	0	[]	[]
115	mir-129-2	32633356	TRUE	6	[('32633356', 'MiR-129-2 weakens proliferation and promotes apoptosis of liver cancer cells by suppressing the Wnt signaling pathway.'), ('27191994', 'Methylation-mediated repression of microRNA-129-2 suppresses cell aggressiveness by inhibiting high mobility group box 1 in human hepatocellular carcinoma.'), ('23402613', 'Methylation-mediated repression of microRNA 129-2 enhances oncogenic SOX4 e…	[('25970172', 'Hepatitis B virus replication and sex-determining region Y box 4 production are tightly controlled by a novel positive feedback mechanism.'), ('23580407', 'Frequent DNA methylation of MiR-129-2 and its potential clinical implication in hepatocellular carcinoma.'), ('23364900', 'Concordant hypermethylation of intergenic microRNA genes in human hepatocellular carcinoma as new diagnos…
116	mir-181b-2		FALSE	0	[]	[]
117	mir-526b	33843021	TRUE	5	[('34135394', 'Mutant p53s and chromosome 19 microRNA cluster overexpression regulate cancer testis antigen expression and cellular transformation in hepatocellular carcinoma.'), ('33843021', 'Long non-coding RNA HOTAIR promotes hepatocellular carcinoma progression by regulating miR-526b-3p/DHX33 axis.'), ('32116112', 'Oncogenic hsa_circ_0091581 promotes the malignancy of HCC cell through blockin…	[('33116877', 'CircRNA circUGGT2 Contributes to Hepatocellular Carcinoma Development via Regulation of the miR-526b-5p/RAB1A Axis.')]
118	mir-186	34665488	TRUE	20	[('34986537', 'Resveratrol inhibits the migration, invasion and epithelial-mesenchymal transition in liver cancer cells through up- miR-186-5p expression.'), ('34665488', 'LINC01291 promotes hepatocellular carcinoma development by targeting the miR-186-5p/OXSR1 axis.'), ('33880589', 'circ-PRKCI targets miR-1294 and miR-186-5p by downregulating FOXK1 expression to suppress glycolysis in hepatocell…	[('35573701', 'Bioinformatics Study Revealed Significance of Exosome Transcriptome in Hepatocellular Carcinoma Diagnosis.'), ('35031872', 'miRNAs derived from plasma small extracellular vesicles predict organo-tropic metastasis of gastric cancer.'), ('34708048', 'A Review on the Carcinogenic Roles of DSCAM-AS1.'), ('33816273', 'miR-186 Inhibits Liver Cancer Stem Cells Expansion via Targeting PTPN…
119	mir-1285		FALSE	4	[('31854049', 'MiR-1285-5p/TMEM194A axis affects cell proliferation in breast cancer.'), ('28253715', 'MicroRNA-1285 inhibits malignant biological behaviors of human pancreatic cancer cells by negative regulation of YAP1.'), ('25230788', 'miR-1285-3p acts as a potential tumor suppressor miRNA via downregulating JUN expression in hepatocellular carcinoma.')]	[('27554417', 'Diagnosis of HCC for patients with cirrhosis using miRNA profiles of the tumor-surrounding tissue - A statistical model based on stepwise penalized logistic regression.')]
120	mir-519e		FALSE	0	[]	[]
121	mir-376a-2		FALSE	20	[('35651333', 'Melatonin inhibits glycolysis in hepatocellular carcinoma cells by downregulating mitochondrial respiration and mTORC1 activity.'), ('35648115', 'TRG16, targeted by miR-765, inhibits breast cancer stem cell-like properties via regulating the NF-kappaB pathway.')]	[('35654476', 'Stereotactic radiofrequency ablation as a valid first-line treatment option for hepatocellular adenomas.'), ('35652419', 'Comparison of nivolumab and sorafenib for first systemic therapy in patients with hepatocellular carcinoma and Child-Pugh B cirrhosis.'), ('35652264', 'A Functional Screening Identifies a New Organic Selenium Compound Targeting Cancer Stem Cells: Role of c-Myc T…
122	mir-512		FALSE	6	[('35094988', 'Diagnosis and staging of HCV associated fibrosis, cirrhosis and hepatocellular carcinoma with target identification for miR-650, 552-3p, 676-3p, 512-5p and 147b.'), ('31975381', 'The chromosome 19 microRNA cluster, regulated by promoter hypomethylation, is associated with tumour burden and poor prognosis in patients with hepatocellular carcinoma.'), ('23082062', 'Identification of …	[('32612368', 'Hypoxia-Induced Placenta-Specific microRNA (miR-512-3p) Promotes Hepatocellular Carcinoma Progression by Targeting Large Tumor Suppressor Kinase 2.')]
123	mir-376a	34095464, 22684007	TRUE	7	[('34095464', 'SNHG1 knockdown upregulates miR-376a and downregulates FOXK1/Snail axis to prevent tumor growth and metastasis in HCC.'), ('32795656', 'The combination of coffee compounds attenuates early fibrosis-associated hepatocarcinogenesis in mice: involvement of miRNA profile modulation.'), ('25613642', 'MiR-376a and histone deacetylation 9 form a regulatory circuitry in hepatocellular carc…	[('33398718', 'Pseudogene Annexin A2 Pseudogene 1 Contributes to Hepatocellular Carcinoma Progression by Modulating Its Parental Gene ANXA2 via miRNA-376a-3p.'), ('32369692', 'Molecular Pathways Leading to Induction of Cell Death and Anti-Proliferative Properties by Tacrolimus and mTOR Inhibitors in Liver Cancer Cells.'), ('31078148', 'Clinical significance of HDAC9 in hepatocellular carcinoma.')]
124	mir-432	35543347	TRUE	6	[('35543347', 'Circular RNA circRNA-0039459 promotes the migration, invasion, and proliferation of liver cancer cells through the adsorption of miR-432.'), ('33675609', 'Circular RNA circ_0021093 regulates miR-432/Annexin A2 pathway to promote hepatocellular carcinoma progression.'), ('30086881', 'Overexpression of circular RNA circ_001569 indicates poor prognosis in hepatocellular carcinoma and …	[('24592541', 'MicroRNA expression profiles of circulating microvesicles in hepatocellular carcinoma.'), ('22629365', 'Identification of postoperative prognostic microRNA predictors in hepatocellular carcinoma.')]
125	mir-20b	33812045	TRUE	10	[('33812045', 'MiR-20b-5p promotes hepatocellular carcinoma cell proliferation, migration and invasion by down-regulating CPEB3.'), ('32931356', 'LncRNA WWOX-AS1 sponges miR-20b-5p in hepatocellular carcinoma and represses its progression by upregulating WWOX.'), ('30854070', 'MicroRNA-20b promotes proliferation of H22 hepatocellular carcinoma cells by targeting PTEN.'), ('30132576', 'miR20b nega…	[('33854885', 'LncRNA Lnc-APUE is Repressed by HNF4alpha and Promotes G1/S Phase Transition and Tumor Growth by Regulating MiR-20b/E2F1 Axis.'), ('33552286', 'Circulating plasma exosomal miRNA profiles serve as potential metastasis-related biomarkers for hepatocellular carcinoma.'), ('26612965', 'Clinicopathological Significance of MicroRNA-20b Expression in Hepatocellular Carcinoma and Regulatio…
126	mir-215	31297882	TRUE	20	[('33173413', 'Interactome analysis of gene expression profiles identifies CDC6 as a potential therapeutic target modified by miR-215-5p in hepatocellular carcinoma.'), ('31297882', 'Insight into the molecular mechanism of LINC00152/miR-215/CDK13 axis in hepatocellular carcinoma progression.'), ('29187907', 'Long non-coding RNA UICLM promotes colorectal cancer liver metastasis by acting as a ceRN…	[('35473687', 'Role of let7-g and miR-221 level as potential predictors for overall survival of hepatocellular carcinoma patients.'), ('34629898', 'The Mutation and Expression Level of LRP1B are Associated with Immune Infiltration and Prognosis in Hepatocellular Carcinoma.'), ('34343125', 'Role of circulating microRNA-21 and microRNA-215 in the diagnosis of hepatitis C related hepatocellular carc…
127	mir-1290	33564307	TRUE	5	[('24060847', 'Molecular pathways and functional analysis of miRNA expression associated with paclitaxel-induced apoptosis in hepatocellular carcinoma cells.')]	[('33564307', 'Exosomal MiR-1290 Promotes Angiogenesis of Hepatocellular Carcinoma via Targeting SMEK1.'), ('30604369', 'Epigenetic Alternations of MicroRNAs and DNA Methylation Contribute to Liver Metastasis of Colorectal Cancer.'), ('27916938', 'Comprehensive Analysis of miRNome Alterations in Response to Sorafenib Treatment in Colorectal Cancer Cells.'), ('26918346', 'Early-phase circulating m…
128	mir-1301	35258395	TRUE	7	[('35258395', 'Has_circ_0008583 modulates hepatocellular carcinoma progression through the miR-1301-3p/METTL3 pathway.'), ('33495099', 'CTCF-induced upregulation of LINC01207 promotes gastric cancer progression via miR-1301-3p/PODXL axis.'), ('30317567', 'LINC01433 promotes hepatocellular carcinoma progression via modulating the miR-1301/STAT3 axis.'), ('28817119', 'miR-1301 inhibits hepatocellul…	[('30868974', 'The KLF6 Super Enhancer Modulates Cell Proliferation via MiR-1301 in Human Hepatoma Cells.')]
129	mir-1	30962696	TRUE	20	[('35421276', 'LncRNA TUG1 functions as a ceRNA for miR-1-3p to promote cell proliferation in hepatic carcinogenesis.'), ('31846694', "Mutant ACTB mRNA 3'-UTR promotes hepatocellular carcinoma development by regulating miR-1 and miR-29a."), ('30962696', 'miR-1-3p suppresses proliferation of hepatocellular carcinoma through targeting SOX9.'), ('29904144', 'The role of miR-122 in the dysregulation …	[('35452485', 'Immune-related biomarkers shared by inflammatory bowel disease and liver cancer.'), ('35201491', 'Comprehensive analysis of the MIR4435-2HG/miR-1-3p/MMP9/miR-29-3p/DUXAP8 ceRNA network axis in hepatocellular carcinoma.'), ('34395415', 'ORC6, Negatively Regulated by miR-1-3p, Promotes Proliferation, Migration, and Invasion of Hepatocellular Carcinoma Cells.'), ('34034986', 'MicroRNA…
130	mir-181d		FALSE	6	[('20023698', 'TGFbeta-mediated upregulation of hepatic miR-181b promotes hepatocarcinogenesis by targeting TIMP3.')]	[('30416681', 'LncRNAs as novel players in hepatocellular carcinoma recurrence.'), ('27080237', 'Stratification of Digestive Cancers with Different Pathological Features and Survival Outcomes by MicroRNA Expression.'), ('26939869', 'Distinct miRNA profiles in normal and gastric cancer myofibroblasts and significance in Wnt signaling.'), ('24314246', '[Morphology and microRNA expression profiles o…
131	mir-105	34388478	TRUE	10	[('34388478', 'Propofol induces hepatocellular carcinoma cell apoptosis via regulating miR-105/JAK2/STAT3 axis.'), ('31127852', 'PES1 is regulated by CD44 in liver cancer stem cells via miR-105-5p.'), ('28060733', 'High expression of miR-105-1 positively correlates with clinical prognosis of hepatocellular carcinoma by targeting oncogene NCOA1.'), ('25280563', 'MicroRNA-105 suppresses cell prolif…	[('33313167', 'Bioinformatic analysis and in vitro validation of a five-microRNA signature as a prognostic biomarker of hepatocellular carcinoma.'), ('33204160', 'miR-105 Promotes the Progression and Predicts the Prognosis for Oral Squamous Cell Carcinoma (OSCC).'), ('32961635', 'Identification of modules and novel prognostic biomarkers in liver cancer through integrated bioinformatics analysis.'…
132	mir-1231		FALSE	3	[('31642612', 'Exosomal miRNA-1231 derived from bone marrow mesenchymal stem cells inhibits the activity of pancreatic cancer.')]	[('26927063', 'MicroRNAs as Biomarkers for Liver Disease and Hepatocellular Carcinoma.'), ('22824466', "A miR-1231 binding site polymorphism in the 3'UTR of IFNAR1 is associated with hepatocellular carcinoma susceptibility.")]
133	mir-509	34115554	TRUE	5	[('34115554', 'MicroRNA miR-509-3p inhibit metastasis and epithelial-mesenchymal transition in hepatocellular carcinoma.'), ('25144722', 'Mir-509-5p joins the Mdm2/p53 feedback loop and regulates cancer cell growth.'), ('24882622', 'The oncoprotein HBXIP up-regulates SCG3 through modulating E2F1 and miR-509-3p in hepatoma cells.')]	[('34564990', 'Expression of miR-187 and miR-509-3p in serum of primary hepatocellular carcinoma patients and its evaluation of prognosis.'), ('32221502', 'Knockdown of LINC00467 contributed to Axitinib sensitivity in hepatocellular carcinoma through miR-509-3p/PDGFRA axis.')]
134	mir-99a	28624790	TRUE	13	[('28624790', 'Co-targeting of IGF1R/mTOR pathway by miR-497 and miR-99a impairs hepatocellular carcinoma development.'), ('28387375', 'PLGA-based dual targeted nanoparticles enhance miRNA transfection efficiency in hepatic carcinoma.'), ('26640557', 'Bafilomycin A1 inhibits the growth and metastatic potential of the BEL-7402 liver cancer and HO-8910 ovarian cancer cell lines and induces alterati…	[('34989596', 'Circulating MicroRNAs, Polychlorinated Biphenyls, and Environmental Liver Disease in the Anniston Community Health Survey.'), ('33575116', 'Comprehensive analysis to identify DLEU2L/TAOK1 axis as a prognostic biomarker in hepatocellular carcinoma.'), ('33274225', 'Investigation of the miRNA and mRNA Coexpression Network and Their Prognostic Value in Hepatocellular Carcinoma.'), ('3…
135	mir-532	33862456	TRUE	17	[('33862456', 'Loss of androgen receptor promotes HCC invasion and metastasis via activating circ-LNPEP/miR-532-3p/RAB9A signal under hypoxia.'), ('32249890', 'LncRNA LINC00668 promotes cell proliferation, migration, invasion ability and EMT process in hepatocellular carcinoma by targeting miR-532-5p/YY1 axis.'), ('31599409', 'Circular circ_0000885 promotes hepatocellular carcinoma proliferation …	[('35340237', 'Bioinformatics Methods Reveal the Biomarkers and the miRNA-mRNA Network in Hepatocellular Carcinoma.'), ('34786378', 'CircANTXR1 Contributes to the Malignant Progression of Hepatocellular Carcinoma by Promoting Proliferation and Metastasis.'), ('34319456', 'miRNA and long non-coding RNA transcriptional expression in hepatocellular carcinoma cell line-secreted extracellular vesicles…
136	mir-489	33402977	TRUE	6	[('33402977', 'Effects of miR-489 targeting on SOX4 gene on proliferation and apoptosis of human hepatocellular carcinoma cells.'), ('29859298', 'Autotaxin exacerbates tumor progression by enhancing MEK1 and overriding the function of miR-489-3p.'), ('29071516', 'MiR-489 suppresses tumor growth and invasion by targeting HDAC7 in colorectal cancer.'), ('28430582', 'LncRNA CHRF-induced miR-489 loss…	[('28651018', 'Meta-analysis of miRNA expression profiles for prostate cancer recurrence following radical prostatectomy.'), ('28430373', 'A five-miRNA expression signature predicts survival in hepatocellular carcinoma.')]
137	mir-767	32333091	TRUE	4	[('32333091', 'Functional analysis of miR-767-5p during the progression of hepatocellular carcinoma and the clinical relevance of its dysregulation.'), ('29627570', 'Circular RNA hsa_circ_0000673 promotes hepatocellular carcinoma malignance by decreasing miR-767-3p targeting SET.')]	[('32961635', 'Identification of modules and novel prognostic biomarkers in liver cancer through integrated bioinformatics analysis.'), ('32082574', 'The mir-767-105 cluster: a crucial factor related to the poor prognosis of hepatocellular carcinoma.')]
138	mir-885	32937160	TRUE	17	[('32937160', 'MicroRNA-885 regulates the growth and epithelial mesenchymal transition of human liver cancer cells by suppressing tropomodulin 1 expression.'), ('31119791', 'miR-885-5p plays an accomplice role in liver cancer by instigating TIGAR expression via targeting its promoter.'), ('28460469', 'Identification of microRNA 885-5p as a novel regulator of tumor metastasis by targeting CPEB2 in…	[('35234251', 'MicroRNAs as messengers of liver diseases: has the message finally been decrypted?'), ('33040799', 'Serum miR-885-5p can be used as a marker for efficacy prediction and prognosis of advanced liver cancer.'), ('33015376', 'Circulating microRNAs associated with liver fibrosis in chronic hepatitis C patients.'), ('32099401', 'MicroRNA 885-5p Inhibits Hepatocellular Carcinoma Metastasi…
139	mir-1296	28606154	TRUE	3	[('32523376', 'Circ_0000517 Contributes to Hepatocellular Carcinoma Progression by Upregulating TXNDC5 via Sponging miR-1296-5p.'), ('28606154', 'MicroRNA-1296 inhibits metastasis and epithelial-mesenchymal transition of hepatocellular carcinoma by targeting SRPK1-mediated PI3K/AKT pathway.')]	[('30064138', 'Identifying Differentially Expressed MicroRNAs Between Cirrhotic and Non-Cirrhotic Hepatocellular Carcinoma and Exploring Their Functions Using Bioinformatic Analysis.')]
140	mir-216a	30556161	TRUE	12	[('33021963', 'MicroRNA-216a-3p promotes sorafenib sensitivity in hepatocellular carcinoma by downregulating MAPK14 expression.'), ('30556161', 'lncRNA A1BG-AS1 suppresses proliferation and invasion of hepatocellular carcinoma cells by targeting miR-216a-5p.'), ('30430564', 'DANCR contributed to hepatocellular carcinoma malignancy via sponging miR-216a-5p and modulating KLF12.'), ('29177609', 'Di…	[('34038612', 'Identification of microRNA-96-5p as a postoperative, prognostic microRNA predictor in nonviral hepatocellular carcinoma.'), ('33813720', 'An Integrated Data Analysis of mRNA, miRNA and Signaling Pathways in Pancreatic Cancer.'), ('29997205', 'Transduction with Lentiviral Vectors Altered the Expression Profile of Host MicroRNAs.')]
141	mir-708	28789462	TRUE	12	[('34583064', 'Elevated LINC01232 is associated with poor prognosis and HBV infection in hepatocellular carcinoma patients and contributes to tumor progression in vitro.'), ('33514855', 'ZEB1 serves an oncogenic role in the tumourigenesis of HCC by promoting cell proliferation, migration, and inhibiting apoptosis via Wnt/beta-catenin signaling pathway.'), ('31419576', 'Relevance function of micro…	[('31486298', 'Identification and external validation of a novel miRNA signature for lymph node metastasis prediction in submucosal-invasive gastric cancer patients.')]
142	mir-744	24991193	TRUE	5	[('31210353', 'Integrated analysis of clinical significance and functional involvement of microRNAs in hepatocellular carcinoma.'), ('24991193', 'Decrease expression of microRNA-744 promotes cell proliferation by targeting c-Myc in human hepatocellular carcinoma.')]	[('31553714', 'Exosomal MiR-744 Inhibits Proliferation and Sorafenib Chemoresistance in Hepatocellular Carcinoma by Targeting PAX2.'), ('28468075', '[Bioinformatics on vascular invasion markers in hepatocellular carcinoma via Big-Data analysis].'), ('25543521', 'miR-744 is a potential prognostic marker in patients with hepatocellular carcinoma.')]
143	mir-378a	35184646	TRUE	15	[('35184646', 'microRNA-378a-3p regulates the progression of hepatocellular carcinoma by regulating PD-L1 and STAT3.'), ('34795209', 'Inhibition of DTYMK significantly restrains the growth of HCC and increases sensitivity to oxaliplatin.'), ('34788772', 'Sea cucumber peptides inhibit the malignancy of NSCLC by regulating miR-378a-5p targeted TUSC2.'), ('34749775', 'DNMT1-induced miR-378a-3p silen…	[('34869393', 'CircCRIM1 Promotes Hepatocellular Carcinoma Proliferation and Angiogenesis by Sponging miR-378a-3p and Regulating SKP2 Expression.'), ('33634974', 'MiR-378a-3p as a putative biomarker for hepatocellular carcinoma diagnosis and prognosis: Computational screening with experimental validation.'), ('31545228', 'Enhancement of anticancer activity of docetaxel by combination with Fuzheng…
144	mir-151a	34535770	TRUE	1	[('34535770', 'miR-151a-3p-rich small extracellular vesicles derived from gastric cancer accelerate liver metastasis via initiating a hepatic stemness-enhancing niche.')]	[]
145	mir-493	34182091	TRUE	10	[('34182091', 'Circ-CSPP1 knockdown suppresses hepatocellular carcinoma progression through miR-493-5p releasing-mediated HMGB1 downregulation.'), ('31883160', 'MicroRNA-493-5p-mediated repression of the MYCN oncogene inhibits hepatic cancer cell growth and invasion.'), ('29758928', 'MicroRNA-493 suppresses cell proliferation and invasion by targeting ZFX in human hepatocellular carcinoma.'), ('2…	[('31320614', 'MEG3-derived miR-493-5p overcomes the oncogenic feature of IGF2-miR-483 loss of imprinting in hepatic cancer cells.')]
146	mir-532	33862456	TRUE	17	[('33862456', 'Loss of androgen receptor promotes HCC invasion and metastasis via activating circ-LNPEP/miR-532-3p/RAB9A signal under hypoxia.'), ('32249890', 'LncRNA LINC00668 promotes cell proliferation, migration, invasion ability and EMT process in hepatocellular carcinoma by targeting miR-532-5p/YY1 axis.'), ('31599409', 'Circular circ_0000885 promotes hepatocellular carcinoma proliferation …	[('35340237', 'Bioinformatics Methods Reveal the Biomarkers and the miRNA-mRNA Network in Hepatocellular Carcinoma.'), ('34786378', 'CircANTXR1 Contributes to the Malignant Progression of Hepatocellular Carcinoma by Promoting Proliferation and Metastasis.'), ('34319456', 'miRNA and long non-coding RNA transcriptional expression in hepatocellular carcinoma cell line-secreted extracellular vesicles…
147	mir-1303		FALSE	4	[('32360865', 'Nedd8-activating enzyme inhibitor MLN4924 (Pevonedistat), inhibits miR-1303 to suppress human breast cancer cell proliferation via targeting p27(Kip1).'), ('22865282', 'A functional screening identifies five microRNAs controlling glypican-3: role of miR-1271 down-regulation in hepatocellular carcinoma.')]	[('32369692', 'Molecular Pathways Leading to Induction of Cell Death and Anti-Proliferative Properties by Tacrolimus and mTOR Inhibitors in Liver Cancer Cells.'), ('30092792', 'A circRNA-miRNA-mRNA network identification for exploring underlying pathogenesis and therapy strategy of hepatocellular carcinoma.')]
148	mir-509	34115554	TRUE	5	[('34115554', 'MicroRNA miR-509-3p inhibit metastasis and epithelial-mesenchymal transition in hepatocellular carcinoma.'), ('25144722', 'Mir-509-5p joins the Mdm2/p53 feedback loop and regulates cancer cell growth.'), ('24882622', 'The oncoprotein HBXIP up-regulates SCG3 through modulating E2F1 and miR-509-3p in hepatoma cells.')]	[('34564990', 'Expression of miR-187 and miR-509-3p in serum of primary hepatocellular carcinoma patients and its evaluation of prognosis.'), ('32221502', 'Knockdown of LINC00467 contributed to Axitinib sensitivity in hepatocellular carcinoma through miR-509-3p/PDGFRA axis.')]
149	mir-576		FALSE	0	[]	[]
150	mir-19b-2		FALSE	0	[]	[]
151	mir-942	31632084	TRUE	7	[('34997317', 'SOX2-OT induced by PAI-1 promotes triple-negative breast cancer cells metastasis by sponging miR-942-5p and activating PI3K/Akt signaling.'), ('34376644', 'Telocytes promote hepatocellular carcinoma by activating the ERK signaling pathway and miR-942-3p/MMP9 axis.'), ('32856218', 'Overexpression of circ_0001445 decelerates hepatocellular carcinoma progression by regulating miR-942-…	[('33603784', 'Identification of a Novel Metastasis-Related miRNAs-Based Signature for Predicting the Prognosis of Hepatocellular Carcinoma.'), ('31046434', 'MiR-942-3p Promotes the Proliferation and Invasion of Hepatocellular Carcinoma Cells by Targeting MBL2.')]
152	mir-497	34076988	TRUE	20	[('34983537', 'CircRTN4 promotes pancreatic cancer progression through a novel CircRNA-miRNA-lncRNA pathway and stabilizing epithelial-mesenchymal transition protein.'), ('34076988', 'miR-497 targets VEGF signal pathway to regulate proliferation, invasion and migration of hepatocellular carcinoma cells: a primary study using DEC-MRI.'), ('33845641', 'CircANKRD52 Promotes the Tumorigenesis of Hepa…	[('34577789', "The Expression of Circulating miR-497 and Metadherin in Hepatocellular Carcinoma: Relation to the Tumor Characteristics and Patients' Survival."), ('34564768', 'CircRNA Circ-CCND1 Aggravates Hepatocellular Carcinoma Tumorigenesis by Regulating the miR-497-5p/HMGA2 Axis.'), ('34305409', 'The Maturation of Tumor Suppressor miR-497 in Hepatocellular Carcinoma is Inhibited by Oncogenic…
153	mir-744	24991193	TRUE	5	[('31210353', 'Integrated analysis of clinical significance and functional involvement of microRNAs in hepatocellular carcinoma.'), ('24991193', 'Decrease expression of microRNA-744 promotes cell proliferation by targeting c-Myc in human hepatocellular carcinoma.')]	[('31553714', 'Exosomal MiR-744 Inhibits Proliferation and Sorafenib Chemoresistance in Hepatocellular Carcinoma by Targeting PAX2.'), ('28468075', '[Bioinformatics on vascular invasion markers in hepatocellular carcinoma via Big-Data analysis].'), ('25543521', 'miR-744 is a potential prognostic marker in patients with hepatocellular carcinoma.')]
154	mir-92a-2	32587378	TRUE	2	[('32587378', 'The miR-92a-2-5p in exosomes from macrophages increases liver cancer cells invasion via altering the AR/PHLPP/p-AKT/beta-catenin signaling.')]	[('32800647', 'A machine learning approach identified a diagnostic model for pancreatic cancer through using circulating microRNA signatures.')]
155	mir-525	24599008	TRUE	4	[('24599008', 'MiR-525-3p enhances the migration and invasion of liver cancer cells by downregulating ZNF395.'), ('23082062', 'Identification of deregulated miRNAs and their targets in hepatitis B virus-associated hepatocellular carcinoma.'), ('22362728', 'MiR-138 induces cell cycle arrest by targeting cyclin D3 in hepatocellular carcinoma.')]	[('26551630', 'Small Molecule Targeting of a MicroRNA Associated with Hepatocellular Carcinoma.')]
156	mir-518e		FALSE	2	[('23082062', 'Identification of deregulated miRNAs and their targets in hepatitis B virus-associated hepatocellular carcinoma.'), ('22362728', 'MiR-138 induces cell cycle arrest by targeting cyclin D3 in hepatocellular carcinoma.')]	[]
157	mir-1	30962696	TRUE	20	[('35421276', 'LncRNA TUG1 functions as a ceRNA for miR-1-3p to promote cell proliferation in hepatic carcinogenesis.'), ('31846694', "Mutant ACTB mRNA 3'-UTR promotes hepatocellular carcinoma development by regulating miR-1 and miR-29a."), ('30962696', 'miR-1-3p suppresses proliferation of hepatocellular carcinoma through targeting SOX9.'), ('29904144', 'The role of miR-122 in the dysregulation …	[('35452485', 'Immune-related biomarkers shared by inflammatory bowel disease and liver cancer.'), ('35201491', 'Comprehensive analysis of the MIR4435-2HG/miR-1-3p/MMP9/miR-29-3p/DUXAP8 ceRNA network axis in hepatocellular carcinoma.'), ('34395415', 'ORC6, Negatively Regulated by miR-1-3p, Promotes Proliferation, Migration, and Invasion of Hepatocellular Carcinoma Cells.'), ('34034986', 'MicroRNA…
158	let-7d		FALSE	4	[('32610114', 'Dampened VEPH1 activates mTORC1 signaling by weakening the TSC1/TSC2 association in hepatocellular carcinoma.')]	[('34989596', 'Circulating MicroRNAs, Polychlorinated Biphenyls, and Environmental Liver Disease in the Anniston Community Health Survey.'), ('32301252', 'Longitudinal analysis of serum microRNAs as predictors of cirrhosis regression during treatment of hepatitis B virus infection.'), ('32102538', 'Serum microRNA let-7a-1/let-7d/let-7f and miRNA 143/145 Gene Expression Profiles as Potential Bioma…
159	mir-508	27881003	TRUE	2	[('27881003', 'miR-508-5p acts as an anti-oncogene by targeting MESDC1 in hepatocellular carcinoma.'), ('24060847', 'Molecular pathways and functional analysis of miRNA expression associated with paclitaxel-induced apoptosis in hepatocellular carcinoma cells.')]	[]
160	mir-1249	31429522	TRUE	4	[('31429522', 'miR-1249-3p accelerates the malignancy phenotype of hepatocellular carcinoma by directly targeting HNRNPK.'), ('29672926', 'Insights into the etiology-associated gene regulatory networks in hepatocellular carcinoma from The Cancer Genome Atlas.'), ('28365245', 'Induced MiR-1249 expression by aberrant activation of Hedegehog signaling pathway in hepatocellular carcinoma.')]	[('23205106', 'Identification of pathogenesis-related microRNAs in hepatocellular carcinoma by expression profiling.')]
161	mir-493	31883160, 29758928	TRUE	10	[('34182091', 'Circ-CSPP1 knockdown suppresses hepatocellular carcinoma progression through miR-493-5p releasing-mediated HMGB1 downregulation.'), ('31883160', 'MicroRNA-493-5p-mediated repression of the MYCN oncogene inhibits hepatic cancer cell growth and invasion.'), ('29758928', 'MicroRNA-493 suppresses cell proliferation and invasion by targeting ZFX in human hepatocellular carcinoma.'), ('2…	[('31320614', 'MEG3-derived miR-493-5p overcomes the oncogenic feature of IGF2-miR-483 loss of imprinting in hepatic cancer cells.')]
162	mir-651		FALSE	1	[]	[('35386284', 'Identification of lncRNA/circRNA-miRNA-mRNA ceRNA Network as Biomarkers for Hepatocellular Carcinoma.')]
163	mir-33a	30243081	TRUE	15	[('32665773', 'Tumor mutation burden associated with miRNA-gene interaction outcome mediates the survival of patients with liver hepatocellular carcinoma.'), ('32627938', 'Circ-SPECC1 modulates TGFbeta2 and autophagy under oxidative stress by sponging miR-33a to promote hepatocellular carcinoma tumorigenesis.'), ('32621257', 'Long non-coding RNA CRNDE promotes malignant progression of hepatocellu…	[('33465419', 'Expression of miR-18a-5p, miR-144-3p, and miR-663b in colorectal cancer and their association with cholesterol homeostasis.'), ('33098283', 'Role of mir-33a, mir-203b, mir361-3p, and mir-424 in hepatocellular carcinoma'), ('30943047', 'microRNA-33a prevents epithelial-mesenchymal transition, invasion, and metastasis of gastric cancer cells through the Snail/Slug pathway.'), ('27881…
164	mir-193b	20655737	TRUE	16	[('34914965', 'LncRNA GASAL1 promotes hepatocellular carcinoma progression by up-regulating USP10-stabilized PCNA.'), ('31705929', 'Macrophages-induced long noncoding RNA H19 up-regulation triggers and activates the miR-193b/MAPK1 axis and promotes cell aggressiveness in hepatocellular carcinoma.'), ('29064597', 'miR-23b-3p and miR-125b-5p downregulate apo(a) expression by targeting Ets1 in HepG2…	[('35473687', 'Role of let7-g and miR-221 level as potential predictors for overall survival of hepatocellular carcinoma patients.'), ('34258170', 'Comprehensive Analysis of Competing Endogenous RNA Network Focusing on Long Noncoding RNA Involved in Cirrhotic Hepatocellular Carcinoma.'), ('33015376', 'Circulating microRNAs associated with liver fibrosis in chronic hepatitis C patients.'), ('28750…
165	mir-581		FALSE	6	[('33461166', 'Long intergenic non-coding RNA LINC00485 exerts tumor-suppressive activity by regulating miR-581/EDEM1 axis in colorectal cancer.'), ('28895405', 'Screening key miRNAs for human hepatocellular carcinoma based on miRNA-mRNA functional synergistic network.')]	[('32355738', 'Identification and integrated analysis of hepatocellular carcinoma-related circular RNA signature.'), ('27258521', 'Comprehensive Circular RNA Profiling Reveals That hsa_circ_0005075, a New Circular RNA Biomarker, Is Involved in Hepatocellular Crcinoma Development.'), ('25903466', 'Serum miR-182 and miR-331-3p as diagnostic and prognostic markers in patients with hepatocellular car…
166	mir-610	25491321	TRUE	5	[('27485527', 'MicroRNA-610 is downregulated in glioma cells, and inhibits proliferation and motility by directly targeting MDM2.'), ('26840456', 'Gain-of-function miRNA signature by mutant p53 associates with poor cancer outcome.'), ('25491321', 'Downregulation of miR-610 promotes proliferation and tumorigenicity and activates Wnt/beta-catenin signaling in human hepatocellular carcinoma.')]	[('32884351', 'Circ_0015756 Aggravates Hepatocellular Carcinoma Development by Regulating FGFR1 via Sponging miR-610.'), ('32848465', 'Circular RNA MAT2B Induces Colorectal Cancer Proliferation via Sponging miR-610, Resulting in an Increased E2F1 Expression.')]
167	mir-147a	35179300	TRUE	1	[('35179300', 'Exosomal lncRNA HMMR-AS1 mediates macrophage polarization through miR-147a/ARID3A axis under hypoxia and affects the progression of hepatocellular carcinoma.')]	[]
168	mir-486	32313144	TRUE	16	[('32313144', 'miR-486-3p mediates hepatocellular carcinoma sorafenib resistance by targeting FGFR4 and EGFR.'), ('31976317', 'MiR-486-5p Suppresses Proliferation and Migration of Hepatocellular Carcinoma Cells through Downregulation of the E3 Ubiquitin Ligase CBL.'), ('31758671', 'Circ-TCF4.85 silencing inhibits cancer progression through microRNA-486-5p-targeted inhibition of ABCF2 in hepatocel…	[('35386284', 'Identification of lncRNA/circRNA-miRNA-mRNA ceRNA Network as Biomarkers for Hepatocellular Carcinoma.'), ('26895105', 'miR-486-5p expression pattern in esophageal squamous cell carcinoma, gastric cancer and its prognostic value.'), ('26176380', 'Identification of recurrence-related serum microRNAs in hepatocellular carcinoma following hepatectomy.'), ('25962820', 'Differential expr…
169	mir-190a	35199873	TRUE	2	[('35199873', 'CircRNA_0008194 functions as a ceRNA to promote invasion of hepatocellular carcinoma via inhibiting miR-190a/AHNAK signaling pathway.'), ('26608035', 'miR-190a inhibits epithelial-mesenchymal transition of hepatoma cells via targeting the long non-coding RNA treRNA.')]	[]
170	mir-208a		FALSE	0	[]	[]
171	mir-508	27881003	TRUE	2	[('27881003', 'miR-508-5p acts as an anti-oncogene by targeting MESDC1 in hepatocellular carcinoma.'), ('24060847', 'Molecular pathways and functional analysis of miRNA expression associated with paclitaxel-induced apoptosis in hepatocellular carcinoma cells.')]	[]
172	mir-30d	20054866	TRUE	10	[('30804330', 'Glycine decarboxylase induces autophagy and is downregulated by miRNA-30d-5p in hepatocellular carcinoma.'), ('28440426', 'Downregulation of microRNA-30d promotes cell proliferation and invasion by targeting LRH-1 in colorectal carcinoma.'), ('28381192', 'Downregulation of sorting nexin 10 is associated with overexpression of miR-30d during liver cancer progression in rats.'), ('27…	[('32724415', 'Comprehensive analysis of circulating microRNAs as predictive biomarkers for sorafenib therapy outcome in hepatocellular carcinoma.'), ('30542726', 'Exosomal microRNAs as potential biomarkers for cancer cell migration and prognosis in hepatocellular carcinoma patient-derived cell models.'), ('26046780', 'A Seven-microRNA Expression Signature Predicts Survival in Hepatocellular Carc…
173	mir-525	24599008	TRUE	4	[('24599008', 'MiR-525-3p enhances the migration and invasion of liver cancer cells by downregulating ZNF395.'), ('23082062', 'Identification of deregulated miRNAs and their targets in hepatitis B virus-associated hepatocellular carcinoma.'), ('22362728', 'MiR-138 induces cell cycle arrest by targeting cyclin D3 in hepatocellular carcinoma.')]	[('26551630', 'Small Molecule Targeting of a MicroRNA Associated with Hepatocellular Carcinoma.')]
174	mir-193a	30710422	TRUE	20	[('34730679', 'CircRNA has_circ_0001806 promotes hepatocellular carcinoma progression via the miR-193a-5p/MMP16 pathway.'), ('32095323', 'Downregulation of miR-193a-3p is involved in the pathogenesis of hepatocellular carcinoma by targeting CCND1.'), ('31799651', 'Long noncoding RNA ZFAS1 promotes hepatocellular carcinoma proliferation by epigenetically repressing miR-193a-3p.'), ('31210353', 'In…	[('35165519', 'Mig-6 Inhibits Autophagy in HCC Cell Lines by Modulating miR-193a-3p.'), ('32960907', 'Circulating levels of microRNA193a-5p predict outcome in early stage hepatocellular carcinoma.'), ('31320713', 'Circulating microRNAs as Potential Diagnostic and Prognostic Biomarkers in Hepatocellular Carcinoma.'), ('28036298', 'Clinical and biological significance of miR-23b and miR-193a in hum…
